# Supplementary material for: A combined crossed molecular beam and theoretical investigation of the reaction of the meta-tolyl radical with vinylacetylene – toward the formation of methylnaphthalenes
Source: Royal Society of Chemistry journal article supplement (doi:10.1039/c5cp03285g), 2015-01-01
Supplement: c5cp03285g1.pdf [file c5cp03285g1.pdf]

**Supporting Information**  
for  
A Combined Crossed Molecular Beam and  
Theoretical Investigation of the Reaction of the  
Meta-Tolyl Radical with Vinylacetylene - Toward  
the Formation of Methylnaphthalenes

Tao Yang,<sup>a</sup> Lloyd Muzangwa,<sup>a</sup> Ralf I. Kaiser\*<sup>a</sup>

*<sup>a</sup>Department of Chemistry, University of Hawaii at Manoa, Honolulu, Hawaii 96822, U.S.A*

Adeel Jamal,<sup>b</sup> Keiji Morokuma\*<sup>b,c</sup>

*<sup>b</sup>Fukui Institute for Fundamental Chemistry, Kyoto University, Sakyo, Kyoto 606-8103, Japan*

*<sup>c</sup>Department of Chemistry and Cherry L. Emerson Center for Scientific Computation, Emory  
University, Atlanta, Georgia 30322, U.S.A*

\*Corresponding Author:

Professor Dr. Ralf I. Kaiser; Email: [ralfk@hawaii.edu](mailto:ralfk@hawaii.edu); Phone: +1-808-956-5731

Professor Dr. Keiji Morokuma; Email: [morokuma@fukui.kyoto-u.ac.jp](mailto:morokuma@fukui.kyoto-u.ac.jp); Phone: +81-75-711-7843

List of Contents:

|                                                                                                                                                                                                                                                               |    |
|---------------------------------------------------------------------------------------------------------------------------------------------------------------------------------------------------------------------------------------------------------------|----|
| Table S1. Optimized geometries, and computed vibrational frequencies of the reactants, various intermediates, transition states and products of the reaction of meta-tolyl radical with vinylacetylene calculated at the UM06-2x/cc-pvtz level of theory..... | 3  |
| Table S2. Forward and reverse RRKM rate constants (in $s^{-1}$ ) as functions of the collision energy E (in $kJ mol^{-1}$ ) for the reaction steps from the reaction of meta-tolyl radical with vinylacetylene producing the initial adduct <b>i1</b> .....   | 51 |
| Table S3. Statistical product branching ratios (%) from the initial adduct <b>i1</b> as functions of the collision energy E (in $kJ mol^{-1}$ ).....                                                                                                          | 52 |

**Table S1.** Optimized geometries, and computed vibrational frequencies of the reactants, various intermediates, transition states and products of the reaction of meta-tolyl radical with vinylacetylene calculated at the UM06-2x/cc-pvtz level of theory.

|                                                                                                                                                                                                                                                                                                                                                                                                                                                                                                                                                                                                                                                                                  |                                                                                                                                                                                                                                                                                                                                                                                                                          |
|----------------------------------------------------------------------------------------------------------------------------------------------------------------------------------------------------------------------------------------------------------------------------------------------------------------------------------------------------------------------------------------------------------------------------------------------------------------------------------------------------------------------------------------------------------------------------------------------------------------------------------------------------------------------------------|--------------------------------------------------------------------------------------------------------------------------------------------------------------------------------------------------------------------------------------------------------------------------------------------------------------------------------------------------------------------------------------------------------------------------|
| <p><b>meta-tolyl radical</b></p> <p>C 0.241480 0.324442 -0.010249<br/>           C 1.634851 0.305546 0.016081<br/>           C 2.256005 1.526698 0.023504<br/>           C 1.626693 2.741765 0.007815<br/>           C 0.227676 2.751699 -0.014953<br/>           C -0.444108 1.531765 -0.026138<br/>           H -0.308383 -0.607784 -0.021975<br/>           H 2.184867 -0.625380 0.025880<br/>           H 2.180111 3.673079 0.010172<br/>           H -1.526565 1.528656 -0.050656<br/>           C -0.525640 4.053072 -0.001567<br/>           H -1.515420 3.938294 -0.440514<br/>           H -0.654685 4.412431 1.020974<br/>           H 0.009692 4.823164 -0.555266</p> | <p>98, 211, 352, 426, 491, 522, 628, 691, 780, 804, 886, 917,<br/>           1004, 1011, 1014, 1068, 1078, 1112, 1182, 1230, 1307,<br/>           1317, 1414, 1454, 1497, 1500, 1513, 1608, 1683, 3055,<br/>           3120, 3149, 3174, 3175, 3189, 3202,</p>                                                                                                                                                           |
| <p><b>vinylacetylene</b></p> <p>C -3.970166 -0.234909 -0.107709<br/>           H -3.495103 -1.206236 -0.107709<br/>           H -5.050158 -0.199441 -0.107709<br/>           C -3.253014 0.883524 -0.107709<br/>           H -3.746733 1.848225 -0.107709<br/>           C -1.825648 0.907183 -0.107709<br/>           C -0.627469 0.951568 -0.107709<br/>           H 0.434193 0.983652 -0.107709</p>                                                                                                                                                                                                                                                                           | <p>226, 318, 563, 706, 712, 720, 893, 980, 1018, 1112, 1325,<br/>           1447, 1705, 2250, 3154, 3164, 3250, 3480,</p>                                                                                                                                                                                                                                                                                                |
| <p><b>i1</b></p> <p>C -1.490273 -0.339969 -0.259228<br/>           C -0.191061 -0.167367 -0.734065<br/>           C 0.383722 1.093123 -0.673952<br/>           C -0.307039 2.188737 -0.156935<br/>           C -1.600741 1.994548 0.307574<br/>           C -2.189664 0.736512 0.255803<br/>           H -1.943536 -1.323446 -0.293187</p>                                                                                                                                                                                                                                                                                                                                       | <p>18, 31, 117, 139, 177, 216, 269, 286, 396, 403, 448, 496,<br/>           532, 549, 575, 581, 652, 700, 725, 758, 812, 872, 918,<br/>           932, 945, 1016, 1019, 1030, 1039, 1070, 1134, 1145,<br/>           1189, 1195, 1203, 1280, 1294, 1336, 1352, 1405, 1414,<br/>           1476, 1480, 1496, 1513, 1544, 1672, 1689, 2042, 3043,<br/>           3055, 3097, 3116, 3140, 3161, 3169, 3173, 3185, 3201,</p> |

|                                                                                                                                                                                                                                                                                                                                                                                                                                                                                                                                                                                                                                                                                                                                                                                                                                |                                                                                                                                                                                                                                                                                                                                                                                  |
|--------------------------------------------------------------------------------------------------------------------------------------------------------------------------------------------------------------------------------------------------------------------------------------------------------------------------------------------------------------------------------------------------------------------------------------------------------------------------------------------------------------------------------------------------------------------------------------------------------------------------------------------------------------------------------------------------------------------------------------------------------------------------------------------------------------------------------|----------------------------------------------------------------------------------------------------------------------------------------------------------------------------------------------------------------------------------------------------------------------------------------------------------------------------------------------------------------------------------|
| <p>H 1.396300 1.231955 -1.038110<br/> H -2.151612 2.832483 0.716210<br/> H -3.197704 0.599194 0.623790<br/> C 0.341707 3.545030 -0.121085<br/> H -0.243374 4.245808 0.471646<br/> H 1.342966 3.488354 0.306287<br/> H 0.439371 3.955486 -1.127424<br/> C 0.571138 -1.351166 -1.291523<br/> H 0.052186 -1.752604 -2.162626<br/> C 0.735283 -2.436839 -0.272974<br/> H 1.231478 -2.193954 0.657541<br/> C 0.255951 -3.715264 -0.454266<br/> C -0.177644 -4.835532 -0.630569<br/> H -0.553267 -5.817787 -0.778727<br/> H 1.554123 -1.010700 -1.629221</p>                                                                                                                                                                                                                                                                         | <p>3469,</p>                                                                                                                                                                                                                                                                                                                                                                     |
| <p><b>i2</b></p> <p>C -0.555359 -1.404113 0.644703<br/> C 0.799233 -1.336009 0.335009<br/> C 1.296690 -0.212100 -0.304678<br/> C 0.467341 0.855304 -0.647151<br/> C -0.882915 0.767949 -0.334455<br/> C -1.391514 -0.354444 0.307845<br/> H -0.944673 -2.286945 1.136679<br/> H 2.352082 -0.163005 -0.551212<br/> H -1.544155 1.583329 -0.600252<br/> H -2.446577 -0.408955 0.540701<br/> C 1.032136 2.075385 -1.320662<br/> H 1.465479 2.756954 -0.586316<br/> H 1.819383 1.807317 -2.024378<br/> H 0.258867 2.618896 -1.861018<br/> C 1.729067 -2.473695 0.738498<br/> H 2.704080 -2.274043 0.273084<br/> C 1.891892 -2.519753 2.227135<br/> H 1.997399 -3.463060 2.738465<br/> H 2.056496 -1.595719 2.759662<br/> C 1.260054 -3.763566 0.221117<br/> C 0.870312 -4.820896 -0.182453<br/> H 0.525234 -5.756307 -0.548917</p> | <p>29, 78, 102, 159, 187, 208, 215, 278, 310, 387, 424, 452,<br/> 459, 531, 552, 618, 660, 717, 725, 731, 775, 820, 865,<br/> 918, 928, 944, 1017, 1017, 1027, 1071, 1083, 1104,<br/> 1130, 1187, 1198, 1234, 1284, 1304, 1342, 1348, 1417,<br/> 1452, 1477, 1496, 1511, 1542, 1671, 1689, 2262, 2999,<br/> 3055, 3115, 3142, 3165, 3169, 3175, 3181, 3201, 3290,<br/> 3481,</p> |
| <p><b>i3</b></p>                                                                                                                                                                                                                                                                                                                                                                                                                                                                                                                                                                                                                                                                                                                                                                                                               |                                                                                                                                                                                                                                                                                                                                                                                  |

|                                                                                                                                                                                                                                                                                                                                                                                                                                                                                                                                                                                                                                                                                                                                                                                                         |                                                                                                                                                                                                                                                                                                                                                                                  |
|---------------------------------------------------------------------------------------------------------------------------------------------------------------------------------------------------------------------------------------------------------------------------------------------------------------------------------------------------------------------------------------------------------------------------------------------------------------------------------------------------------------------------------------------------------------------------------------------------------------------------------------------------------------------------------------------------------------------------------------------------------------------------------------------------------|----------------------------------------------------------------------------------------------------------------------------------------------------------------------------------------------------------------------------------------------------------------------------------------------------------------------------------------------------------------------------------|
| <p>C -0.644824 -0.072648 -0.154726<br/> C 0.732072 -0.085862 0.051428<br/> C 1.414277 1.124640 0.145569<br/> C 0.750820 2.341208 0.033775<br/> C -0.627153 2.331370 -0.163633<br/> C -1.319225 1.133697 -0.258574<br/> H -1.177256 -1.012021 -0.220957<br/> H 2.486948 1.115968 0.298282<br/> H -1.159550 3.271370 -0.240971<br/> H -2.390460 1.140186 -0.408857<br/> C 1.513388 3.636176 0.095453<br/> H 2.360346 3.562765 0.776348<br/> H 1.904399 3.900488 -0.888856<br/> H 0.874865 4.453453 0.427277<br/> C 1.464449 -1.381026 0.128278<br/> C 1.245871 -2.310331 -0.780489<br/> H 1.621799 -3.303029 -0.972290<br/> C 2.416322 -1.641395 1.227336<br/> H 3.015621 -2.537801 1.112424<br/> C 2.551735 -0.904388 2.324427<br/> H 1.963301 -0.012234 2.490891<br/> H 3.255680 -1.188288 3.094351</p> | <p>50, 106, 143, 171, 216, 261, 328, 360, 439, 463, 500, 529,<br/> 540, 619, 696, 715, 735, 774, 824, 859, 892, 934, 954,<br/> 974, 1001, 1019, 1023, 1027, 1035, 1066, 1125, 1143,<br/> 1197, 1236, 1312, 1322, 1335, 1352, 1411, 1439, 1462,<br/> 1495, 1501, 1542, 1654, 1666, 1685, 1705, 3049, 3111,<br/> 3135, 3147, 3160, 3175, 3179, 3190, 3204, 3236, 3239,</p>         |
| <p><b>i4</b></p> <p>C -2.187029 -0.364251 -0.370248<br/> C -0.912964 -0.165500 0.158176<br/> C -0.298055 1.081346 0.136949<br/> C -0.988232 2.149166 -0.425760<br/> C -2.259768 1.968567 -0.957462<br/> C -2.858244 0.723428 -0.933307<br/> H -0.390562 -1.006777 0.600579<br/> H -0.528821 3.129734 -0.445810<br/> H -2.784514 2.809681 -1.390668<br/> H -3.849419 0.579652 -1.344589<br/> C 1.089982 1.262818 0.686950<br/> H 1.836826 1.131063 -0.098068<br/> H 1.220832 2.261119 1.102171<br/> H 1.301154 0.535232 1.469252<br/> C -2.792944 -1.698381 -0.321632<br/> H -2.189977 -2.482594 0.142288<br/> C -3.983310 -2.026972 -0.783406</p>                                                                                                                                                       | <p>45, 78, 89, 123, 193, 215, 233, 249, 308, 384, 446, 504,<br/> 528, 546, 630, 684, 721, 775, 806, 853, 919, 924, 948,<br/> 972, 977, 1017, 1017, 1023, 1026, 1073, 1129, 1142,<br/> 1197, 1200, 1246, 1299, 1315, 1332, 1352, 1420, 1444,<br/> 1474, 1497, 1510, 1544, 1661, 1680, 1689, 1739, 3060,<br/> 3070, 3107, 3122, 3144, 3161, 3166, 3168, 3189, 3206,<br/> 3255,</p> |

|                                                                                                                                                                                                                                                                                                                                                                                                                                                                                                                                                                                                                                                                                                                                                                                                                                        |                                                                                                                                                                                                                                                                                                                                                                                  |
|----------------------------------------------------------------------------------------------------------------------------------------------------------------------------------------------------------------------------------------------------------------------------------------------------------------------------------------------------------------------------------------------------------------------------------------------------------------------------------------------------------------------------------------------------------------------------------------------------------------------------------------------------------------------------------------------------------------------------------------------------------------------------------------------------------------------------------------|----------------------------------------------------------------------------------------------------------------------------------------------------------------------------------------------------------------------------------------------------------------------------------------------------------------------------------------------------------------------------------|
| <p>C -4.794054 -3.200705 -0.865614<br/> H -4.364215 -4.109626 -0.444994<br/> C -6.008016 -3.238023 -1.412220<br/> H -6.453738 -2.347672 -1.835700<br/> H -6.579142 -4.154513 -1.447233</p>                                                                                                                                                                                                                                                                                                                                                                                                                                                                                                                                                                                                                                             |                                                                                                                                                                                                                                                                                                                                                                                  |
| <p><b>i5</b></p> <p>C -2.211525 -0.911396 -0.006893<br/> C -0.819612 -1.017680 0.003010<br/> C -0.142899 0.180432 -0.005450<br/> C -0.672907 1.443476 -0.023959<br/> C -2.071356 1.500387 -0.037119<br/> C -2.823645 0.337490 -0.027370<br/> H -2.826586 -1.801673 -0.002549<br/> H -2.561576 2.466594 -0.059734<br/> H -3.903307 0.399349 -0.040165<br/> C 0.176685 2.684269 -0.007755<br/> H 0.373421 2.999321 1.018176<br/> H 1.135994 2.506595 -0.489567<br/> H -0.325981 3.504057 -0.518729<br/> C -0.065821 -2.325925 0.019611<br/> H 0.595514 -2.365978 -0.847433<br/> H 0.584491 -2.350606 0.895496<br/> C -0.955399 -3.569887 0.025029<br/> H -1.610419 -3.558997 0.898799<br/> H -1.600000 -3.573822 -0.856482<br/> C -0.162760 -4.795491 0.040124<br/> C 0.510913 -5.785114 0.052285<br/> H 1.102592 -6.667187 0.062601</p> | <p>49, 82, 93, 99, 196, 211, 217, 274, 380, 391, 475, 487,<br/> 516, 524, 622, 706, 717, 724, 762, 766, 805, 922, 930,<br/> 978, 1000, 1006, 1021, 1052, 1062, 1080, 1125, 1190,<br/> 1215, 1256, 1279, 1299, 1325, 1338, 1388, 1413, 1453,<br/> 1482, 1491, 1498, 1501, 1507, 1621, 1686, 2264, 3060,<br/> 3063, 3076, 3096, 3117, 3126, 3155, 3163, 3195, 3213,<br/> 3478,</p> |
| <p><b>i6</b></p> <p>C -2.088685 -0.920844 -0.273208<br/> C -0.725757 -1.001967 -0.131775<br/> C -0.065209 0.221703 0.012276<br/> C -0.746734 1.434032 0.007752<br/> C -2.132118 1.430103 -0.147390<br/> C -2.827112 0.232843 -0.289444<br/> H 1.013730 0.220939 0.132176<br/> H -2.672253 2.369148 -0.156465<br/> H -3.902231 0.223650 -0.410051<br/> C -0.003606 2.728477 0.199675</p>                                                                                                                                                                                                                                                                                                                                                                                                                                                | <p>44, 68, 89, 97, 192, 212, 234, 285, 369, 404, 432, 487,<br/> 533, 544, 614, 702, 714, 722, 756, 779, 817, 910, 925,<br/> 975, 978, 1006, 1024, 1044, 1070, 1072, 1151, 1184,<br/> 1202, 1248, 1270, 1308, 1320, 1328, 1387, 1418, 1438,<br/> 1479, 1486, 1496, 1500, 1504, 1638, 1671, 2263, 3057,<br/> 3060, 3070, 3093, 3114, 3120, 3148, 3157, 3173, 3196,<br/> 3482,</p>  |

|                                                                                                                                                                                                                                                                                                                                                                                                                                                                                                                                                                                                                                                                                                                                                                                                                               |                                                                                                                                                                                                                                                                                                                                                                                       |
|-------------------------------------------------------------------------------------------------------------------------------------------------------------------------------------------------------------------------------------------------------------------------------------------------------------------------------------------------------------------------------------------------------------------------------------------------------------------------------------------------------------------------------------------------------------------------------------------------------------------------------------------------------------------------------------------------------------------------------------------------------------------------------------------------------------------------------|---------------------------------------------------------------------------------------------------------------------------------------------------------------------------------------------------------------------------------------------------------------------------------------------------------------------------------------------------------------------------------------|
| <p>H 0.057274 2.986064 1.258623<br/> H 1.013668 2.659196 -0.182475<br/> H -0.505842 3.549067 -0.310480<br/> C 0.031632 -2.304533 -0.150251<br/> H 0.495164 -2.442629 -1.129661<br/> H 0.846487 -2.262955 0.573623<br/> C -0.859006 -3.512212 0.151260<br/> H -1.338205 -3.380632 1.123527<br/> H -1.662847 -3.569075 -0.586050<br/> C -0.104577 -4.761352 0.143673<br/> C 0.539842 -5.770518 0.132687<br/> H 1.104340 -6.670143 0.124089</p>                                                                                                                                                                                                                                                                                                                                                                                  |                                                                                                                                                                                                                                                                                                                                                                                       |
| <p><b>i7</b></p> <p>C 0.007111 0.008621 -0.003397<br/> C -0.008915 0.007333 1.382506<br/> C 1.179528 0.005494 2.098740<br/> C 2.389812 0.005252 1.424959<br/> C 2.438143 0.003254 0.034518<br/> C 1.235553 0.005528 -0.680925<br/> C -1.273161 0.084544 -0.801253<br/> C -1.193937 -0.709479 -2.114617<br/> C 0.092640 -0.370359 -2.758778<br/> C 1.213202 -0.027789 -2.161225<br/> H -0.957906 0.010935 1.904467<br/> H 1.161626 0.002722 3.180090<br/> H -1.457485 1.134456 -1.051221<br/> H -2.115480 -0.256106 -0.199175<br/> H -1.226605 -1.786797 -1.922751<br/> H -2.045204 -0.468667 -2.751247<br/> H 2.119446 0.186638 -2.713249<br/> C 3.762035 -0.012945 -0.679615<br/> H 3.840890 -0.872514 -1.346683<br/> H 3.897209 0.883273 -1.287977<br/> H 4.582742 -0.060368 0.032999<br/> H 3.317356 0.000652 1.983638</p> | <p>118, 135, 152, 231, 281, 283, 386, 437, 459, 482, 522,<br/> 545, 568, 652, 723, 754, 798, 816, 858, 873, 931, 933,<br/> 983, 1006, 1012, 1035, 1060, 1065, 1119, 1177, 1192,<br/> 1206, 1214, 1265, 1290, 1297, 1334, 1340, 1378, 1411,<br/> 1468, 1478, 1479, 1490, 1513, 1524, 1659, 1672, 1716,<br/> 3033, 3042, 3044, 3103, 3103, 3106, 3136, 3170, 3182,<br/> 3185, 3201,</p> |
| <p><b>i8</b></p> <p>C 0.031648 -0.062340 -0.014208<br/> C -0.000432 0.137458 1.284983<br/> C 1.281324 0.141424 2.019665<br/> C 2.476757 0.240732 1.290306</p>                                                                                                                                                                                                                                                                                                                                                                                                                                                                                                                                                                                                                                                                 | <p>103, 124, 145, 230, 263, 301, 393, 410, 428, 463, 487,<br/> 556, 603, 675, 728, 754, 783, 819, 873, 892, 919, 921,</p>                                                                                                                                                                                                                                                             |

|                                                                                                                                                                                                                                                                                                                                                                                                                                                                                                                                                                                                                                                                                                                                                                                                                                       |                                                                                                                                                                                                                                                                                                                                                                                   |
|---------------------------------------------------------------------------------------------------------------------------------------------------------------------------------------------------------------------------------------------------------------------------------------------------------------------------------------------------------------------------------------------------------------------------------------------------------------------------------------------------------------------------------------------------------------------------------------------------------------------------------------------------------------------------------------------------------------------------------------------------------------------------------------------------------------------------------------|-----------------------------------------------------------------------------------------------------------------------------------------------------------------------------------------------------------------------------------------------------------------------------------------------------------------------------------------------------------------------------------|
| <p>C 2.406372 0.470265 -0.200294<br/> C 1.230069 -0.273231 -0.856101<br/> H 0.415404 -0.048004 3.965356<br/> H -0.923345 0.248199 1.842526<br/> C 1.337600 0.023306 3.401759<br/> C 3.684534 0.202157 1.964221<br/> H 3.346320 0.189057 -0.675281<br/> H 1.081019 0.088667 -1.873420<br/> C 3.750107 0.072335 3.352209<br/> C 2.558833 -0.009198 4.060711<br/> H 4.607248 0.281104 1.398531<br/> H 2.584899 -0.102257 5.139342<br/> C 5.080112 0.005039 4.049784<br/> H 4.973067 0.183906 5.118314<br/> H 5.537059 -0.977954 3.920436<br/> H 5.774245 0.742516 3.647027<br/> H 1.435789 -1.346423 -0.921951<br/> H 2.264688 1.542284 -0.370841</p>                                                                                                                                                                                    | <p>966, 987, 1012, 1032, 1034, 1074, 1154, 1174, 1187,<br/> 1207, 1227, 1258, 1284, 1317, 1331, 1338, 1371, 1420,<br/> 1465, 1468, 1478, 1497, 1507, 1545, 1643, 1692, 1718,<br/> 3033, 3041, 3060, 3097, 3101, 3122, 3141, 3157, 3159,<br/> 3174, 3191,</p>                                                                                                                      |
| <p><b>i9</b></p> <p>C -5.086707 -1.536317 0.196459<br/> C -3.607775 -1.602558 0.024394<br/> C -2.914771 -0.262692 0.003946<br/> C -3.645281 0.935691 0.140371<br/> C -5.067376 0.875891 0.301086<br/> C -5.743658 -0.353267 0.323852<br/> H -3.172028 -2.220983 0.819976<br/> C -1.536598 -0.216127 -0.152763<br/> C -2.957935 2.173318 0.115400<br/> H -6.819117 -0.353813 0.446912<br/> C -1.584305 2.180000 -0.042904<br/> C -0.867711 0.994694 -0.177078<br/> H 0.206394 1.021645 -0.299906<br/> H -5.629030 1.791428 0.405798<br/> H -0.986129 -1.143925 -0.256150<br/> H -5.633733 -2.469300 0.217226<br/> H -1.060606 3.127584 -0.062267<br/> C -3.708035 3.467452 0.259551<br/> H -4.448778 3.588455 -0.532894<br/> H -4.242081 3.512607 1.210480<br/> H -3.024766 4.312914 0.215587<br/> H -3.369284 -2.145085 -0.899720</p> | <p>77, 137, 206, 224, 276, 292, 433, 463, 477, 499, 517, 547,<br/> 559, 671, 694, 728, 792, 795, 810, 871, 917, 957, 959,<br/> 992, 995, 999, 1060, 1068, 1103, 1121, 1179, 1190,<br/> 1211, 1235, 1251, 1288, 1314, 1357, 1406, 1418, 1441,<br/> 1444, 1462, 1492, 1507, 1533, 1589, 1643, 1664, 2995,<br/> 3006, 3048, 3105, 3138, 3166, 3175, 3179, 3196, 3204,<br/> 3219,</p> |
| <p><b>i10</b></p>                                                                                                                                                                                                                                                                                                                                                                                                                                                                                                                                                                                                                                                                                                                                                                                                                     |                                                                                                                                                                                                                                                                                                                                                                                   |



|                                                                                                                                                                                                                                                                                                                                                                                                                                                                                                                                                                                                                                                                                                                                                                                                                     |                                                                                                                                                                                                                                                                                                                                                                                   |
|---------------------------------------------------------------------------------------------------------------------------------------------------------------------------------------------------------------------------------------------------------------------------------------------------------------------------------------------------------------------------------------------------------------------------------------------------------------------------------------------------------------------------------------------------------------------------------------------------------------------------------------------------------------------------------------------------------------------------------------------------------------------------------------------------------------------|-----------------------------------------------------------------------------------------------------------------------------------------------------------------------------------------------------------------------------------------------------------------------------------------------------------------------------------------------------------------------------------|
| <p>C -5.049941 -1.521533 0.166559<br/> C -3.652667 -1.504674 0.068331<br/> C -2.938166 -0.265562 0.013689<br/> C -3.639325 0.956412 0.058639<br/> C -5.144171 0.977186 0.166739<br/> C -5.779226 -0.372366 0.214657<br/> H -3.094244 -2.429724 0.033347<br/> C -1.539609 -0.228581 -0.083645<br/> C -2.933227 2.146947 0.005566<br/> H -5.559316 1.549456 -0.673007<br/> H -6.857354 -0.415967 0.291417<br/> C -1.544938 2.183040 -0.090930<br/> C -0.858226 0.970036 -0.134199<br/> H -3.482373 3.083072 0.041518<br/> H 0.222155 0.972981 -0.207993<br/> H -5.433698 1.551998 1.055912<br/> H -0.994822 -1.164115 -0.117727<br/> H -5.561208 -2.474838 0.206117<br/> C -0.817721 3.496842 -0.149518<br/> H -1.087768 4.053879 -1.048129<br/> H -1.070171 4.122151 0.707813<br/> H 0.260718 3.349886 -0.156073</p> | <p>77, 97, 166, 187, 261, 323, 406, 439, 448, 492, 505, 565,<br/> 602, 673, 712, 728, 774, 791, 855, 888, 908, 940, 963,<br/> 987, 988, 991, 1031, 1069, 1090, 1159, 1177, 1183,<br/> 1209, 1240, 1270, 1294, 1317, 1348, 1387, 1418, 1436,<br/> 1450, 1476, 1493, 1505, 1530, 1584, 1630, 1678, 3000,<br/> 3015, 3056, 3116, 3139, 3151, 3173, 3174, 3190, 3196,<br/> 3206,</p>  |
| <p><b>i11</b></p> <p>C -1.419277 0.243401 0.722872<br/> C -0.193823 -0.092664 0.158595<br/> C 0.613712 0.921621 -0.350140<br/> C 0.216852 2.252069 -0.315183<br/> C -1.018551 2.565620 0.246708<br/> C -1.828236 1.568194 0.764965<br/> H -2.055546 -0.535009 1.124732<br/> H 1.582441 0.669582 -0.768453<br/> H -1.342237 3.598556 0.279604<br/> H -2.784885 1.821768 1.202019<br/> C 1.119542 3.335241 -0.838623<br/> H 1.771145 3.709223 -0.046748<br/> H 1.755039 2.965121 -1.641761<br/> H 0.542699 4.178383 -1.216294<br/> C 0.216772 -1.521007 0.088216<br/> C 0.780008 -2.095593 -1.202603</p>                                                                                                                                                                                                              | <p>31, 98, 128, 147, 215, 235, 311, 332, 393, 428, 461, 535,<br/> 552, 593, 691, 723, 732, 765, 809, 817, 893, 915, 916,<br/> 938, 957, 1007, 1010, 1024, 1037, 1049, 1071, 1093,<br/> 1121, 1147, 1190, 1196, 1262, 1312, 1347, 1384, 1418,<br/> 1456, 1477, 1499, 1513, 1543, 1668, 1688, 1818, 3060,<br/> 3123, 3128, 3144, 3154, 3155, 3171, 3189, 3201, 3222,<br/> 3254,</p> |

|                                                                                                                                                                                                                                                                                                                                                                                                                                                                                                                                                                                                                                                                                                                                                                                                                                       |                                                                                                                                                                                                                                                                                                                                                                                  |
|---------------------------------------------------------------------------------------------------------------------------------------------------------------------------------------------------------------------------------------------------------------------------------------------------------------------------------------------------------------------------------------------------------------------------------------------------------------------------------------------------------------------------------------------------------------------------------------------------------------------------------------------------------------------------------------------------------------------------------------------------------------------------------------------------------------------------------------|----------------------------------------------------------------------------------------------------------------------------------------------------------------------------------------------------------------------------------------------------------------------------------------------------------------------------------------------------------------------------------|
| <p>C 1.646557 -1.896931 -0.020424<br/> H -0.398272 -2.199061 0.667422<br/> H 0.902050 -1.404632 -2.027436<br/> H 0.511072 -3.108324 -1.470608<br/> C 2.795255 -1.943390 0.548294<br/> H 3.801207 -2.247253 0.315516</p>                                                                                                                                                                                                                                                                                                                                                                                                                                                                                                                                                                                                               |                                                                                                                                                                                                                                                                                                                                                                                  |
| <p><b>i12</b></p> <p>C -0.849395 -0.718089 -0.498218<br/> C 0.310225 -0.892323 0.291143<br/> C 1.316206 0.055835 0.328833<br/> C 1.176974 1.217643 -0.433753<br/> C 0.046619 1.415641 -1.220089<br/> C -0.953792 0.468508 -1.257254<br/> H 0.417916 -1.790675 0.886810<br/> H 1.956937 1.968270 -0.406795<br/> H -0.048153 2.321268 -1.804384<br/> H -1.834350 0.624406 -1.867381<br/> C 2.551422 -0.156088 1.160096<br/> H 3.403862 -0.408770 0.527416<br/> H 2.810462 0.748021 1.710708<br/> H 2.413391 -0.964439 1.875752<br/> C -1.880580 -1.680456 -0.540302<br/> H -2.746170 -1.496373 -1.160659<br/> C -1.832169 -2.956999 0.240337<br/> H -0.942019 -3.535428 -0.034389<br/> H -1.721525 -2.743089 1.310120<br/> C -3.013848 -3.793337 0.048092<br/> C -3.986494 -4.470013 -0.117368<br/> H -4.847965 -5.073911 -0.261808</p> | <p>37, 91, 121, 124, 193, 201, 246, 332, 346, 396, 446, 501,<br/> 524, 532, 614, 616, 691, 701, 702, 766, 799, 875, 905,<br/> 923, 964, 978, 1002, 1002, 1035, 1070, 1093, 1128,<br/> 1177, 1203, 1215, 1253, 1290, 1323, 1342, 1416, 1433,<br/> 1460, 1462, 1492, 1506, 1523, 1620, 1644, 2266, 3017,<br/> 3038, 3058, 3120, 3139, 3167, 3172, 3174, 3194, 3202,<br/> 3468,</p> |
| <p><b>i13</b></p> <p>C -2.036391 -0.178999 -0.284166<br/> C -0.653762 -0.316990 -0.369661<br/> C 0.167530 0.778741 -0.096487<br/> C -0.370064 2.005967 0.259629<br/> C -1.758058 2.124363 0.340253<br/> C -2.583515 1.043421 0.073673<br/> H -2.664617 -1.033549 -0.499207<br/> H 1.241900 0.660504 -0.172637<br/> H -2.192156 3.078753 0.612717</p>                                                                                                                                                                                                                                                                                                                                                                                                                                                                                  | <p>42, 85, 92, 117, 211, 225, 249, 323, 378, 390, 433, 465,<br/> 489, 534, 553, 598, 700, 713, 756, 812, 824, 880, 923,<br/> 952, 975, 986, 1020, 1024, 1031, 1046, 1071, 1121,<br/> 1128, 1156, 1191, 1193, 1282, 1312, 1346, 1379, 1419,<br/> 1465, 1470, 1498, 1509, 1534, 1658, 1684, 1880, 3059,<br/> 3096, 3122, 3149, 3157, 3170, 3182, 3193, 3208, 3266,<br/> 3275,</p>  |

|                                                                                                                                                                                                                                                                                                                                                                                                                                                                                                                                                                                                                                                                                                                                                                                                                                      |                                                                                                                                                                                                                                                                                                                                                                                 |
|--------------------------------------------------------------------------------------------------------------------------------------------------------------------------------------------------------------------------------------------------------------------------------------------------------------------------------------------------------------------------------------------------------------------------------------------------------------------------------------------------------------------------------------------------------------------------------------------------------------------------------------------------------------------------------------------------------------------------------------------------------------------------------------------------------------------------------------|---------------------------------------------------------------------------------------------------------------------------------------------------------------------------------------------------------------------------------------------------------------------------------------------------------------------------------------------------------------------------------|
| <p>H -3.657219 1.156134 0.140067<br/> C 0.516124 3.179648 0.573498<br/> H 0.616571 3.309671 1.652514<br/> H 1.513619 3.042107 0.159959<br/> H 0.101427 4.102741 0.169815<br/> C -0.083857 -1.589323 -0.748805<br/> C -0.483727 -2.990801 -1.160280<br/> C 0.896406 -2.409455 -0.913668<br/> H -0.789462 -3.144389 -2.192404<br/> H 1.940566 -2.655746 -0.848566<br/> C -1.093250 -3.886912 -0.189150<br/> H -1.782305 -4.659150 -0.494652<br/> H -0.844536 -3.794035 0.858214</p>                                                                                                                                                                                                                                                                                                                                                    |                                                                                                                                                                                                                                                                                                                                                                                 |
| <p><b>i14</b></p> <p>C -2.327955 -2.476962 0.820771<br/> C -0.996819 -2.483930 0.322363<br/> C -0.467341 -1.265485 -0.191782<br/> C -1.214772 -0.108473 -0.208350<br/> C -2.523541 -0.135484 0.290778<br/> C -3.063995 -1.313751 0.797912<br/> H -2.744582 -3.393692 1.213189<br/> H 0.544974 -1.264728 -0.574494<br/> H -3.115759 0.770614 0.278346<br/> H -4.076844 -1.317902 1.178209<br/> C -0.644225 1.174502 -0.747105<br/> H -0.549118 1.917848 0.045607<br/> H 0.339869 1.017889 -1.184575<br/> H -1.296238 1.596057 -1.512665<br/> C -0.245195 -3.628359 0.333442<br/> C 0.472844 -4.713189 0.370115<br/> H 0.436490 -5.391099 -0.482691<br/> C 1.352104 -5.127577 1.485138<br/> H 1.792441 -6.112860 1.385132<br/> C 1.628042 -4.393800 2.555712<br/> H 1.210086 -3.402059 2.680744<br/> H 2.278438 -4.764999 3.334642</p> | <p>33, 45, 87, 124, 166, 183, 226, 315, 340, 419, 438, 524,<br/> 542, 554, 619, 637, 696, 728, 801, 846, 891, 898, 916,<br/> 960, 978, 990, 1011, 1022, 1046, 1070, 1078, 1122,<br/> 1144, 1185, 1240, 1294, 1338, 1341, 1351, 1418, 1433,<br/> 1443, 1493, 1497, 1503, 1595, 1627, 1715, 1886, 3057,<br/> 3085, 3117, 3149, 3158, 3186, 3187, 3189, 3204, 3224,<br/> 3248,</p> |
| <p><b>i15</b></p> <p>C -0.394418 0.506183 1.298750<br/> C 0.745199 0.336466 0.484498</p>                                                                                                                                                                                                                                                                                                                                                                                                                                                                                                                                                                                                                                                                                                                                             |                                                                                                                                                                                                                                                                                                                                                                                 |

|                                                                                                                                                                                                                                                                                                                                                                                                                                                                                                                                                                                                                                                                                                                                          |                                                                                                                                                                                                                                                                                                                                                                                   |
|------------------------------------------------------------------------------------------------------------------------------------------------------------------------------------------------------------------------------------------------------------------------------------------------------------------------------------------------------------------------------------------------------------------------------------------------------------------------------------------------------------------------------------------------------------------------------------------------------------------------------------------------------------------------------------------------------------------------------------------|-----------------------------------------------------------------------------------------------------------------------------------------------------------------------------------------------------------------------------------------------------------------------------------------------------------------------------------------------------------------------------------|
| <p>C 1.223475 1.463364 -0.224327<br/> C 0.612126 2.697097 -0.135876<br/> C -0.514465 2.830549 0.683497<br/> C -1.006802 1.740499 1.390072<br/> H -0.784187 -0.340827 1.847248<br/> H 2.098991 1.345133 -0.852991<br/> H -1.002369 3.794066 0.764113<br/> H -1.879333 1.859588 2.018800<br/> C 1.134921 3.883676 -0.897684<br/> H 1.397678 4.696031 -0.219042<br/> H 2.020049 3.623621 -1.475169<br/> H 0.380352 4.266259 -1.586100<br/> C 1.404056 -0.911155 0.365479<br/> H 2.283169 -0.955480 -0.270162<br/> C 1.015993 -2.118551 1.098546<br/> H 1.449284 -2.287117 2.082094<br/> C 0.135192 -3.060949 0.611485<br/> H -0.297647 -2.881986 -0.374046<br/> C -0.241914 -4.197842 1.269094<br/> H -0.901225 -5.020138 1.049100</p>      | <p>-490, 59, 82, 111, 184, 213, 230, 282, 321, 390, 419, 472,<br/> 523, 529, 559, 611, 637, 708, 748, 801, 811, 855, 890,<br/> 916, 919, 944, 1001, 1005, 1021, 1066, 1096, 1130,<br/> 1169, 1180, 1198, 1248, 1254, 1311, 1328, 1345, 1377,<br/> 1417, 1456, 1479, 1489, 1507, 1519, 1615, 1649, 3056,<br/> 3101, 3114, 3136, 3148, 3152, 3158, 3171, 3186, 3196,<br/> 3266,</p> |
| <p><b>i16</b></p> <p>C -2.493340 -2.614840 -0.021301<br/> C -1.099889 -2.622157 -0.040340<br/> C -0.423984 -1.408809 -0.052483<br/> C -1.101413 -0.191595 -0.045293<br/> C -2.490822 -0.209117 -0.030525<br/> C -3.181722 -1.414074 -0.017411<br/> H -3.030414 -3.555412 -0.014177<br/> H 0.660623 -1.409314 -0.071076<br/> H -3.036181 0.726649 -0.031525<br/> H -4.263614 -1.412947 -0.007645<br/> C -0.344509 1.107791 -0.026637<br/> H -0.170046 1.438316 0.999144<br/> H 0.626755 1.004955 -0.508663<br/> H -0.899300 1.894639 -0.535833<br/> C -0.344763 -3.923298 -0.051776<br/> C -0.761306 -4.982239 0.969607<br/> C -0.798360 -4.986775 -1.052390<br/> H 0.730632 -3.736687 -0.071659<br/> C -1.125074 -5.870967 -0.033066</p> | <p>40, 47, 132, 139, 215, 253, 318, 381, 406, 457, 531, 558,<br/> 572, 615, 681, 732, 803, 818, 884, 916, 921, 930, 943,<br/> 954, 967, 988, 1019, 1025, 1029, 1071, 1131, 1155,<br/> 1183, 1195, 1207, 1208, 1275, 1308, 1310, 1351, 1356,<br/> 1417, 1473, 1481, 1498, 1512, 1545, 1669, 1690, 3052,<br/> 3073, 3117, 3144, 3159, 3172, 3181, 3196, 3203, 3229,<br/> 3244,</p>  |

|                                                                                                                                                                                                                                                                                                                                                                                                                                                                                                                                                                                                                                                                                                                                                                                                                                 |                                                                                                                                                                                                                                                                                                                                                                                   |
|---------------------------------------------------------------------------------------------------------------------------------------------------------------------------------------------------------------------------------------------------------------------------------------------------------------------------------------------------------------------------------------------------------------------------------------------------------------------------------------------------------------------------------------------------------------------------------------------------------------------------------------------------------------------------------------------------------------------------------------------------------------------------------------------------------------------------------|-----------------------------------------------------------------------------------------------------------------------------------------------------------------------------------------------------------------------------------------------------------------------------------------------------------------------------------------------------------------------------------|
| <p>H -0.771279 -4.990177 2.047772<br/> H -0.849184 -4.999396 -2.129428<br/> H -1.513077 -6.879463 -0.023465</p>                                                                                                                                                                                                                                                                                                                                                                                                                                                                                                                                                                                                                                                                                                                 |                                                                                                                                                                                                                                                                                                                                                                                   |
| <p><b>i17</b></p> <p>C -0.312971 -1.079684 -1.162266<br/> C 0.823961 -1.093315 -0.352087<br/> C 1.094199 0.026369 0.435058<br/> C 0.281311 1.154286 0.404786<br/> C -0.827024 1.152982 -0.436034<br/> C -1.124975 0.040193 -1.210098<br/> H -0.546972 -1.948574 -1.764287<br/> H 1.941988 0.003726 1.109060<br/> H -1.467392 2.025557 -0.474395<br/> H -1.996138 0.047287 -1.851425<br/> C 0.573679 2.332092 1.293307<br/> H 0.112702 2.198518 2.273701<br/> H 1.644845 2.454090 1.448048<br/> H 0.180547 3.253533 0.866452<br/> C 1.673396 -2.294294 -0.318822<br/> H 1.140724 -3.238475 -0.357816<br/> C 3.008845 -2.343075 -0.265554<br/> H 3.485942 -3.314307 -0.210551<br/> C 3.918228 -1.201539 -0.331264<br/> H 3.486765 -0.232532 -0.583314<br/> C 5.214698 -1.288965 -0.145892<br/> H 6.050437 -0.609362 -0.167931</p> | <p>54, 83, 103, 154, 190, 220, 259, 344, 357, 443, 458, 519,<br/> 534, 556, 692, 717, 733, 753, 795, 830, 846, 904, 936,<br/> 951, 962, 1021, 1023, 1027, 1028, 1074, 1104, 1131,<br/> 1192, 1200, 1250, 1271, 1279, 1325, 1349, 1418, 1436,<br/> 1473, 1496, 1509, 1540, 1649, 1664, 1682, 1715, 3060,<br/> 3094, 3123, 3144, 3154, 3179, 3181, 3187, 3196, 3215,<br/> 3267,</p> |
| <p><b>i18</b></p> <p>C -0.373947 -0.710455 -1.682448<br/> C 0.798302 -0.945189 -0.964492<br/> C 1.139699 -0.063235 0.062873<br/> C 0.327544 1.007031 0.410690<br/> C -0.846324 1.209795 -0.312083<br/> C -1.189202 0.362538 -1.353261<br/> H -0.624227 -1.348647 -2.519178<br/> H 2.062006 -0.228939 0.608581<br/> H -1.485907 2.048049 -0.063953<br/> H -2.090921 0.546235 -1.922126<br/> C 0.689040 1.919751 1.549573<br/> H 0.113997 1.667244 2.442184</p>                                                                                                                                                                                                                                                                                                                                                                   | <p>44, 91, 117, 164, 183, 219, 254, 330, 362, 432, 468, 512,<br/> 544, 552, 687, 704, 735, 777, 792, 822, 839, 905, 921,<br/> 939, 962, 1018, 1022, 1025, 1026, 1072, 1097, 1133,<br/> 1191, 1202, 1243, 1264, 1284, 1333, 1350, 1416, 1427,<br/> 1471, 1494, 1509, 1543, 1653, 1661, 1686, 1719, 3060,<br/> 3092, 3123, 3143, 3156, 3163, 3177, 3179, 3194, 3208,<br/> 3257,</p> |

|                                                                                                                                                                                                                                                                                                                                                                                                                                                                                                                                                                                                                                                                                                                                                                                                                                                 |                                                                                                                                                                                                                                                                                                                                                                                     |
|-------------------------------------------------------------------------------------------------------------------------------------------------------------------------------------------------------------------------------------------------------------------------------------------------------------------------------------------------------------------------------------------------------------------------------------------------------------------------------------------------------------------------------------------------------------------------------------------------------------------------------------------------------------------------------------------------------------------------------------------------------------------------------------------------------------------------------------------------|-------------------------------------------------------------------------------------------------------------------------------------------------------------------------------------------------------------------------------------------------------------------------------------------------------------------------------------------------------------------------------------|
| <p>H 1.745268 1.839884 1.800341<br/> H 0.471286 2.958630 1.303346<br/> C 1.706879 -2.060050 -1.278394<br/> H 2.764433 -1.823772 -1.227222<br/> C 1.370982 -3.317328 -1.585656<br/> H 2.163050 -4.020093 -1.815309<br/> C 0.020109 -3.872518 -1.584713<br/> H -0.777171 -3.243745 -1.187906<br/> C -0.271869 -5.085425 -1.992434<br/> H -1.162020 -5.689384 -2.053593</p>                                                                                                                                                                                                                                                                                                                                                                                                                                                                        |                                                                                                                                                                                                                                                                                                                                                                                     |
| <p><b>i19</b></p> <p>C -5.744434 -3.054118 0.308146<br/> C -4.380076 -3.025642 0.208008<br/> C -3.698606 -1.830994 -0.070025<br/> C -4.488230 -0.639046 -0.548654<br/> C -5.944255 -0.668178 -0.141957<br/> C -6.506059 -1.842159 0.202211<br/> H -1.735413 -2.623407 0.241339<br/> H -6.254029 -3.976291 0.549132<br/> H -3.799378 -3.919041 0.404521<br/> C -2.302910 -1.722675 0.038560<br/> C -3.768772 0.660203 -0.324994<br/> H -7.565215 -1.874698 0.427671<br/> C -2.440639 0.696228 -0.131495<br/> C -1.668573 -0.510798 -0.025779<br/> H -1.937932 1.649057 -0.028303<br/> H -0.595901 -0.448446 0.089364<br/> C -6.737639 0.594106 -0.254500<br/> H -6.412416 1.334977 0.479284<br/> H -6.613768 1.050355 -1.241137<br/> H -7.796431 0.400440 -0.095643<br/> H -4.333045 1.579037 -0.402628<br/> H -4.528903 -0.749180 -1.661472</p> | <p>74, 146, 219, 265, 288, 381, 398, 452, 453, 496, 513, 561,<br/> 572, 657, 703, 757, 776, 803, 831, 858, 918, 959, 976,<br/> 985, 1001, 1009, 1028, 1057, 1065, 1081, 1096, 1162,<br/> 1185, 1206, 1218, 1256, 1269, 1346, 1366, 1378, 1417,<br/> 1427, 1472, 1484, 1501, 1521, 1559, 1671, 1687, 2759,<br/> 3040, 3091, 3140, 3172, 3174, 3177, 3184, 3204, 3207,<br/> 3213,</p> |
| <p><b>i20</b></p> <p>C -5.861165 -2.973825 0.234756<br/> C -4.533894 -3.019101 0.035016<br/> C -3.786229 -1.809659 -0.442323<br/> C -4.519727 -0.519784 -0.182625<br/> C -5.914540 -0.556328 -0.055492</p>                                                                                                                                                                                                                                                                                                                                                                                                                                                                                                                                                                                                                                      | <p>83, 119, 149, 236, 270, 352, 380, 438, 450, 486, 505, 584,</p>                                                                                                                                                                                                                                                                                                                   |

|                                                                                                                                                                                                                                                                                                                                                                                                                                                                                                                                                                                                                                                                                                                                                                                                                                      |                                                                                                                                                                                                                                                                                                                                                                                   |
|--------------------------------------------------------------------------------------------------------------------------------------------------------------------------------------------------------------------------------------------------------------------------------------------------------------------------------------------------------------------------------------------------------------------------------------------------------------------------------------------------------------------------------------------------------------------------------------------------------------------------------------------------------------------------------------------------------------------------------------------------------------------------------------------------------------------------------------|-----------------------------------------------------------------------------------------------------------------------------------------------------------------------------------------------------------------------------------------------------------------------------------------------------------------------------------------------------------------------------------|
| <p>C -6.587793 -1.741502 0.105199<br/> H -1.821161 -2.691933 0.098776<br/> H -6.396558 -3.867691 0.527008<br/> H -3.979867 -3.942575 0.149154<br/> C -2.347853 -1.753296 -0.022636<br/> C -3.778213 0.674023 -0.120423<br/> H -6.454267 0.382781 -0.019980<br/> H -7.661260 -1.743978 0.229542<br/> C -2.413224 0.681342 -0.008286<br/> C -1.719027 -0.580678 0.127943<br/> H -4.320619 1.613349 -0.095299<br/> H -0.666674 -0.557738 0.386463<br/> C -1.623808 1.949710 0.083866<br/> H -1.050680 1.984848 1.013305<br/> H -0.903750 2.021542 -0.734682<br/> H -2.270094 2.824556 0.045982<br/> H -3.758342 -1.904330 -1.554855</p>                                                                                                                                                                                                 | <p>610, 675, 694, 711, 744, 796, 863, 877, 903, 938, 967,<br/> 996, 1001, 1006, 1012, 1056, 1079, 1084, 1104, 1176,<br/> 1180, 1190, 1215, 1254, 1272, 1350, 1365, 1398, 1414,<br/> 1433, 1458, 1483, 1492, 1518, 1562, 1666, 1689, 2778,<br/> 3039, 3089, 3140, 3159, 3169, 3171, 3172, 3191, 3196,<br/> 3212,</p>                                                               |
| <p><b>i21</b><br/><br/> C -1.560669 0.123090 -0.152807<br/> C -0.201230 0.228188 0.021153<br/> C 0.531092 1.371994 0.232361<br/> C -0.216785 2.547873 0.297779<br/> C -1.600830 2.519805 0.154423<br/> C -2.270942 1.329736 -0.067390<br/> H 0.291354 3.488731 0.473393<br/> H -2.161735 3.441809 0.225831<br/> H -3.347491 1.316088 -0.170317<br/> C 2.028064 1.358662 0.373539<br/> H 2.503979 1.191444 -0.593406<br/> H 2.387980 2.306777 0.769142<br/> H 2.348956 0.559061 1.039526<br/> C -2.201722 -1.192641 -0.340816<br/> H -1.760345 -1.992037 0.243882<br/> C -3.237322 -1.506138 -1.122409<br/> H -3.603769 -2.525634 -1.056570<br/> C -3.945899 -0.660420 -2.093232<br/> H -5.020736 -0.803505 -2.147360<br/> C -3.367287 0.182176 -2.939938<br/> H -3.950850 0.749449 -3.651950<br/> H -2.294343 0.326934 -2.944139</p> | <p>34, 85, 103, 120, 178, 206, 224, 318, 341, 438, 472, 510,<br/> 520, 562, 642, 726, 728, 785, 795, 836, 906, 937, 966,<br/> 987, 996, 1014, 1021, 1031, 1045, 1067, 1095, 1120,<br/> 1188, 1226, 1278, 1302, 1326, 1333, 1417, 1418, 1447,<br/> 1470, 1490, 1499, 1508, 1617, 1676, 1721, 1726, 3063,<br/> 3125, 3142, 3148, 3150, 3156, 3169, 3173, 3194, 3209,<br/> 3240,</p> |

|                                                                                                                                                                                                                                                                                                                                                                                                                                                                                                                                                                                                                                                                                                                                                                                                                                    |                                                                                                                                                                                                                                                                                                                                                       |
|------------------------------------------------------------------------------------------------------------------------------------------------------------------------------------------------------------------------------------------------------------------------------------------------------------------------------------------------------------------------------------------------------------------------------------------------------------------------------------------------------------------------------------------------------------------------------------------------------------------------------------------------------------------------------------------------------------------------------------------------------------------------------------------------------------------------------------|-------------------------------------------------------------------------------------------------------------------------------------------------------------------------------------------------------------------------------------------------------------------------------------------------------------------------------------------------------|
| <p><b>i22</b></p> <p>C -1.285284 0.076426 -0.592853<br/> C -0.033885 0.135140 0.035752<br/> C 0.596728 1.339072 0.333428<br/> C -0.039431 2.530506 0.000116<br/> C -1.284462 2.518056 -0.629717<br/> C -1.846188 1.301334 -0.894311<br/> H 0.455479 -0.796269 0.302315<br/> H 0.437522 3.475495 0.230941<br/> H -1.781739 3.442753 -0.891992<br/> C 1.954738 1.345952 0.982066<br/> H 2.739872 1.198749 0.238437<br/> H 2.145660 2.293813 1.482495<br/> H 2.044593 0.547448 1.717526<br/> C -1.893947 -1.235882 -0.834931<br/> H -1.261721 -2.066728 -0.540673<br/> C -3.113447 -1.546619 -1.287677<br/> H -3.372533 -2.600962 -1.279747<br/> C -4.181369 -0.658853 -1.756767<br/> H -5.173810 -0.882392 -1.376514<br/> C -4.042049 0.322272 -2.640562<br/> H -4.888967 0.919429 -2.950287<br/> H -3.084638 0.542029 -3.094175</p> | <p>36, 110, 123, 132, 181, 202, 231, 314, 380, 427, 442, 513, 537, 578, 645, 713, 733, 803, 816, 824, 901, 920, 965, 975, 993, 1007, 1024, 1029, 1039, 1075, 1095, 1147, 1186, 1239, 1276, 1299, 1331, 1333, 1408, 1418, 1443, 1475, 1495, 1498, 1507, 1635, 1667, 1715, 1717, 3059, 3121, 3139, 3140, 3152, 3155, 3160, 3171, 3174, 3188, 3248,</p>  |
| <p><b>i23</b></p> <p>C -5.871252 -3.029120 0.000284<br/> C -4.493691 -3.015946 0.000134<br/> C -3.790775 -1.800745 0.000245<br/> C -4.510806 -0.589838 0.000477<br/> C -5.907133 -0.608726 0.000593<br/> C -6.574443 -1.829115 0.000522<br/> H -1.830397 -2.728903 -0.000082<br/> H -6.406979 -3.968778 0.000218<br/> H -3.934328 -3.943033 -0.000045<br/> C -2.357984 -1.785340 0.000108<br/> C -3.781364 0.729191 0.000630<br/> H -7.657049 -1.838636 0.000654<br/> C -2.293577 0.623011 0.000431<br/> C -1.651380 -0.577339 0.000195<br/> H -4.105205 1.326087 0.864707</p>                                                                                                                                                                                                                                                     | <p>112, 143, 185, 250, 265, 278, 441, 466, 480, 499, 517, 553, 569, 682, 697, 727, 779, 793, 827, 861, 926, 948, 972, 991, 993, 1010, 1067, 1068, 1107, 1121, 1177, 1193, 1218, 1221, 1242, 1290, 1313, 1363, 1391, 1420, 1437, 1442, 1484, 1492, 1505, 1527, 1583, 1648, 1659, 2995, 3001, 3053, 3108, 3141, 3175, 3176, 3185, 3195, 3202, 3204,</p> |



|                                                                                                                                                                                                                                                                                                                                                                                                                                                                                                                                                                                                                                                                                                                                                                                                                                              |                                                                                                                                                                                                                                                                                                                                                                                  |
|----------------------------------------------------------------------------------------------------------------------------------------------------------------------------------------------------------------------------------------------------------------------------------------------------------------------------------------------------------------------------------------------------------------------------------------------------------------------------------------------------------------------------------------------------------------------------------------------------------------------------------------------------------------------------------------------------------------------------------------------------------------------------------------------------------------------------------------------|----------------------------------------------------------------------------------------------------------------------------------------------------------------------------------------------------------------------------------------------------------------------------------------------------------------------------------------------------------------------------------|
| <p>H -1.726523 1.544114 0.000488<br/> H -0.569200 -0.600858 0.000066<br/> C -6.684145 0.678009 0.000927<br/> H -6.448777 1.284543 0.877910<br/> H -6.449211 1.284720 -0.876046<br/> H -7.754795 0.485407 0.001173<br/> H -4.105413 1.326416 -0.863138</p>                                                                                                                                                                                                                                                                                                                                                                                                                                                                                                                                                                                    |                                                                                                                                                                                                                                                                                                                                                                                  |
| <p><b>i24</b></p> <p>C -5.953698 -3.004106 0.004382<br/> C -4.465571 -3.109740 -0.013859<br/> C -3.747552 -1.784382 -0.009719<br/> C -4.463510 -0.573805 0.010124<br/> C -5.895135 -0.591253 0.027065<br/> C -6.596684 -1.803849 0.023629<br/> H -1.803660 -2.671177 -0.040162<br/> H -6.521915 -3.924528 0.001954<br/> H -4.130243 -3.707768 0.843671<br/> C -2.359472 -1.740507 -0.025106<br/> C -3.751643 0.638297 0.013409<br/> H -6.427794 0.349404 0.042787<br/> H -7.678818 -1.783012 0.036634<br/> C -2.371640 0.676917 -0.001946<br/> C -1.677141 -0.536785 -0.021372<br/> H -4.312954 1.565949 0.028623<br/> H -0.594077 -0.530262 -0.033600<br/> C -1.620179 1.979284 0.002000<br/> H -0.967891 2.048425 0.873556<br/> H -0.989593 2.066363 -0.883765<br/> H -2.300505 2.828621 0.019044<br/> H -4.150125 -3.691850 -0.889634</p> | <p>36, 95, 125, 230, 259, 311, 408, 439, 445, 485, 505, 579,<br/> 601, 679, 709, 724, 773, 799, 839, 892, 919, 948, 962,<br/> 970, 992, 996, 1020, 1066, 1097, 1163, 1177, 1193,<br/> 1211, 1220, 1272, 1290, 1325, 1360, 1377, 1411, 1440,<br/> 1450, 1457, 1490, 1499, 1558, 1581, 1631, 1683, 3002,<br/> 3013, 3052, 3112, 3137, 3165, 3171, 3176, 3183, 3195,<br/> 3204,</p> |
| <p><b>i25</b></p> <p>C 0.067532 -0.156933 -0.128965<br/> C -0.008907 -0.072680 1.260310<br/> C 1.166706 0.019626 1.991904<br/> C 2.416398 0.020625 1.374609<br/> C 2.468405 -0.068391 -0.010145<br/> C 1.300170 -0.157251 -0.757612<br/> H -0.844900 -0.212072 -0.709894<br/> H 1.112866 0.090709 3.073317</p>                                                                                                                                                                                                                                                                                                                                                                                                                                                                                                                               | <p>20, 63, 110, 134, 211, 245, 257, 312, 386, 434, 456, 527,<br/> 551, 609, 659, 718, 732, 762, 816, 862, 870, 919, 937,<br/> 946, 984, 1019, 1019, 1028, 1038, 1069, 1132, 1142,<br/> 1189, 1198, 1207, 1282, 1308, 1336, 1349, 1393, 1415,<br/> 1477, 1482, 1497, 1513, 1542, 1668, 1689, 1797, 3053,<br/> 3057, 3100, 3115, 3118, 3147, 3164, 3169, 3184, 3203,</p>           |

|                                                                                                                                                                                                                                                                                                                                                                                                                                                                                                                                                                                                                                                                                                                                                                                                                       |                                                                                                                                                                                                                                                                                                                                                                                  |
|-----------------------------------------------------------------------------------------------------------------------------------------------------------------------------------------------------------------------------------------------------------------------------------------------------------------------------------------------------------------------------------------------------------------------------------------------------------------------------------------------------------------------------------------------------------------------------------------------------------------------------------------------------------------------------------------------------------------------------------------------------------------------------------------------------------------------|----------------------------------------------------------------------------------------------------------------------------------------------------------------------------------------------------------------------------------------------------------------------------------------------------------------------------------------------------------------------------------|
| <p>H 3.429435 -0.065489 -0.509272<br/> H 1.355618 -0.222704 -1.836138<br/> C 3.671247 0.096913 2.200064<br/> H 4.532242 0.355229 1.586109<br/> H 3.576448 0.843244 2.988597<br/> H 3.877486 -0.861480 2.679834<br/> C -1.357386 -0.044209 1.940519<br/> H -1.959932 -0.898267 1.627117<br/> C -2.103406 1.225778 1.610229<br/> H -1.563176 2.135553 1.864391<br/> C -3.687796 1.288570 1.697292<br/> C -3.140942 1.287468 0.547710<br/> H -1.216934 -0.115625 3.022108<br/> H -4.446369 1.312468 2.453618</p>                                                                                                                                                                                                                                                                                                         | <p>3313,</p>                                                                                                                                                                                                                                                                                                                                                                     |
| <p><b>i26</b></p> <p>C -0.068817 0.651011 0.256600<br/> C 0.028128 0.420106 1.638553<br/> C 1.289449 0.064540 2.157851<br/> C 2.409881 -0.060920 1.358986<br/> C 2.278763 0.175669 -0.011441<br/> C 1.049520 0.527216 -0.548972<br/> H -1.015612 0.925640 -0.180499<br/> H 1.376872 -0.116979 3.223314<br/> H 3.145756 0.083621 -0.654235<br/> H 0.961934 0.708010 -1.612188<br/> C 3.744400 -0.440765 1.938780<br/> H 4.481351 0.344479 1.765818<br/> H 3.675349 -0.609713 3.011810<br/> H 4.124718 -1.351910 1.475471<br/> C -1.071001 0.522191 2.550385<br/> H -0.835608 0.316237 3.586517<br/> C -2.423854 0.849916 2.300735<br/> H -3.068476 0.860685 3.175168<br/> C -3.041286 1.147920 1.159521<br/> C -3.716173 1.445225 0.092973<br/> H -3.813557 2.470972 -0.248043<br/> H -4.197169 0.676779 -0.503843</p> | <p>24, 91, 121, 132, 199, 210, 270, 321, 323, 411, 445, 515,<br/> 536, 553, 565, 703, 716, 767, 793, 813, 899, 903, 911,<br/> 927, 940, 989, 1000, 1010, 1012, 1031, 1069, 1135,<br/> 1156, 1194, 1214, 1266, 1331, 1350, 1375, 1415, 1419,<br/> 1461, 1488, 1490, 1513, 1536, 1635, 1664, 1957, 3054,<br/> 3107, 3115, 3136, 3151, 3166, 3170, 3179, 3193, 3201,<br/> 3233,</p> |
| <p><b>i27</b></p> <p>C 0.000142 0.228615 -0.066029</p>                                                                                                                                                                                                                                                                                                                                                                                                                                                                                                                                                                                                                                                                                                                                                                |                                                                                                                                                                                                                                                                                                                                                                                  |

|                                                                                                                                                                                                                                                                                                                                                                                                                                                                                                                                                                                                                                                                                                                                                                          |                                                                                                                                                                                                                                                                                                                                                                                  |
|--------------------------------------------------------------------------------------------------------------------------------------------------------------------------------------------------------------------------------------------------------------------------------------------------------------------------------------------------------------------------------------------------------------------------------------------------------------------------------------------------------------------------------------------------------------------------------------------------------------------------------------------------------------------------------------------------------------------------------------------------------------------------|----------------------------------------------------------------------------------------------------------------------------------------------------------------------------------------------------------------------------------------------------------------------------------------------------------------------------------------------------------------------------------|
| <p>C -0.126669 -0.226845 1.258747<br/> C 1.051582 -0.395879 2.009401<br/> C 2.299462 -0.125595 1.473445<br/> C 2.388279 0.327334 0.156368<br/> C 1.241227 0.501853 -0.605917<br/> H -0.893832 0.366154 -0.661235<br/> H 0.986243 -0.746250 3.028625<br/> H 3.360803 0.541829 -0.269590<br/> H 1.319319 0.853878 -1.625852<br/> C 3.548777 -0.322761 2.287827<br/> H 4.154667 0.583764 2.297685<br/> H 3.311559 -0.585925 3.316901<br/> H 4.163150 -1.120181 1.867174<br/> C -1.441500 -0.490944 1.760322<br/> H -2.246123 -0.329980 1.054745<br/> C -1.849719 -0.931810 3.040399<br/> H -2.920396 -1.067309 3.165965<br/> C -1.131718 -1.207361 4.127204<br/> C -0.508642 -1.491133 5.228372<br/> H -0.148112 -2.494279 5.432926<br/> H -0.316254 -0.732592 5.980525</p> | <p>33, 95, 112, 135, 197, 212, 269, 309, 350, 404, 447, 524,<br/> 535, 540, 563, 703, 730, 753, 761, 820, 899, 902, 926,<br/> 929, 931, 994, 1004, 1007, 1012, 1043, 1067, 1129,<br/> 1152, 1187, 1215, 1274, 1311, 1350, 1376, 1415, 1438,<br/> 1471, 1476, 1493, 1512, 1533, 1637, 1661, 1959, 3055,<br/> 3109, 3116, 3141, 3148, 3168, 3177, 3182, 3188, 3199,<br/> 3224,</p> |
| <p><b>ilent</b></p> <p>C -1.236899 -0.464092 0.007528<br/> C 0.052464 -0.052375 -0.207667<br/> C 0.487204 1.245851 -0.169082<br/> C -0.453304 2.244495 0.107615<br/> C -1.774121 1.866209 0.334011<br/> C -2.166694 0.534393 0.286586<br/> H -1.515391 -1.509954 -0.028287<br/> H 1.525091 1.507404 -0.342744<br/> H -2.508990 2.630676 0.553419<br/> H -3.200534 0.272062 0.471817<br/> C -0.042346 3.691004 0.132950<br/> H 0.006373 4.095820 -0.879530<br/> H -0.753046 4.291772 0.697872<br/> H 0.942888 3.811721 0.582065<br/> C 1.610255 -1.867502 -0.554369<br/> H 2.110227 -1.248657 -1.285546<br/> H 1.870647 -1.728366 0.485319<br/> C 0.862546 -2.915163 -0.944943</p>                                                                                        | <p>-267, 22, 40, 64, 78, 101, 204, 215, 230, 351, 384, 426,<br/> 491, 521, 563, 596, 667, 696, 718, 738, 778, 789, 882,<br/> 896, 919, 922, 995, 1001, 1009, 1011, 1068, 1075, 1113,<br/> 1114, 1182, 1227, 1303, 1309, 1314, 1416, 1432, 1453,<br/> 1493, 1500, 1513, 1604, 1615, 1680, 2218, 3054, 3118,<br/> 3143, 3155, 3163, 3175, 3184, 3188, 3201, 3252, 3472,</p>        |

|                                                                                                                                                                                                                                                                                                                                                                                                                                                                                                                                                                                                                                                                                                                                                                                                                                      |                                                                                                                                                                                                                                                                                                                                                                            |
|--------------------------------------------------------------------------------------------------------------------------------------------------------------------------------------------------------------------------------------------------------------------------------------------------------------------------------------------------------------------------------------------------------------------------------------------------------------------------------------------------------------------------------------------------------------------------------------------------------------------------------------------------------------------------------------------------------------------------------------------------------------------------------------------------------------------------------------|----------------------------------------------------------------------------------------------------------------------------------------------------------------------------------------------------------------------------------------------------------------------------------------------------------------------------------------------------------------------------|
| <p>H 0.670452 -3.085174 -1.997139<br/> C 0.241260 -3.807404 -0.030877<br/> C -0.297825 -4.562697 0.732293<br/> H -0.765390 -5.232142 1.411578</p>                                                                                                                                                                                                                                                                                                                                                                                                                                                                                                                                                                                                                                                                                    |                                                                                                                                                                                                                                                                                                                                                                            |
| <p><b>i1-p3</b></p> <p>C -1.642796 -0.145670 0.245377<br/> C -0.385446 -0.197663 -0.356441<br/> C 0.288717 0.995833 -0.601882<br/> C -0.248910 2.229119 -0.252205<br/> C -1.498221 2.253863 0.357226<br/> C -2.189937 1.074271 0.600510<br/> H -2.202335 -1.054233 0.419691<br/> H 1.269358 0.955156 -1.064990<br/> H -1.935252 3.203453 0.639416<br/> H -3.166365 1.110413 1.064560<br/> C 0.508443 3.496323 -0.538080<br/> H 0.023646 4.356812 -0.081012<br/> H 1.527548 3.435588 -0.156174<br/> H 0.571965 3.675862 -1.612278<br/> C 0.250183 -1.465314 -0.756686<br/> H 1.009467 -1.393366 -1.527539<br/> H 1.804482 -1.242172 0.385208<br/> C -0.169290 -2.697945 -0.395149<br/> H -0.953998 -2.818657 0.341286<br/> C 0.419402 -3.885018 -0.895091<br/> C 0.912120 -4.900481 -1.306047<br/> H 1.347908 -5.796583 -1.674162</p> | <p>-838, 59, 71, 85, 115, 208, 219, 233, 301, 386, 411, 416,<br/> 443, 464, 507, 535, 585, 651, 680, 718, 719, 784, 810,<br/> 882, 918, 939, 950, 1015, 1017, 1031, 1033, 1050, 1068,<br/> 1136, 1195, 1201, 1270, 1309, 1323, 1336, 1352, 1415,<br/> 1468, 1496, 1506, 1545, 1644, 1668, 1688, 2226, 3054,<br/> 3115, 3142, 3156, 3173, 3175, 3187, 3195, 3205, 3475,</p> |
| <p><b>i1-i5</b></p> <p>C -2.081048 -1.292271 0.084128<br/> C -0.725947 -1.580319 -0.035340<br/> C 0.169207 -0.534860 0.020380<br/> C -0.160766 0.795103 0.184060<br/> C -1.528165 1.054299 0.300503<br/> C -2.468690 0.030000 0.251214<br/> H -2.821286 -2.081848 0.040891<br/> H -1.858872 2.078452 0.427922<br/> H -3.519163 0.272369 0.340671<br/> C 0.868855 1.886888 0.251757</p>                                                                                                                                                                                                                                                                                                                                                                                                                                               | <p>-1830, 42, 99, 116, 187, 195, 229, 241, 396, 409, 437,<br/> 500, 506, 543, 568, 595, 669, 706, 715, 754, 790, 852,<br/> 917, 934, 970, 1005, 1011, 1029, 1046, 1062, 1087,<br/> 1112, 1186, 1190, 1230, 1282, 1297, 1308, 1333, 1357,<br/> 1417, 1453, 1485, 1492, 1506, 1513, 1638, 1671, 1679,<br/> 2214, 3059, 3072, 3110, 3123, 3127, 3152, 3164, 3171,</p>         |

|                                                                                                                                                                                                                                                                                                                                                                                                                                                                                                                                                                                                                                                                                                                                                                                                                                             |                                                                                                                                                                                                                                                                                                                                                                                    |
|---------------------------------------------------------------------------------------------------------------------------------------------------------------------------------------------------------------------------------------------------------------------------------------------------------------------------------------------------------------------------------------------------------------------------------------------------------------------------------------------------------------------------------------------------------------------------------------------------------------------------------------------------------------------------------------------------------------------------------------------------------------------------------------------------------------------------------------------|------------------------------------------------------------------------------------------------------------------------------------------------------------------------------------------------------------------------------------------------------------------------------------------------------------------------------------------------------------------------------------|
| <p>H 1.390584 1.861835 1.209389<br/> H 1.616872 1.764670 -0.530429<br/> H 0.406966 2.866478 0.142367<br/> C -0.063930 -2.926360 -0.211709<br/> H -0.139163 -3.513125 0.704199<br/> H -0.523423 -3.508162 -1.011258<br/> C 1.405255 -2.606114 -0.516492<br/> H 1.631490 -2.563568 -1.579758<br/> H 1.358744 -1.363704 -0.199764<br/> C 2.412667 -3.281316 0.238455<br/> C 3.254303 -3.827342 0.899716<br/> H 4.000288 -4.314464 1.477615</p>                                                                                                                                                                                                                                                                                                                                                                                                 | <p>3196, 3477,</p>                                                                                                                                                                                                                                                                                                                                                                 |
| <p><b>i1-i6</b></p> <p>C -1.545589 -1.675146 -0.010560<br/> C -0.203500 -1.451089 0.221825<br/> C 0.262257 -0.145406 0.175081<br/> C -0.615462 0.902954 -0.102759<br/> C -1.961743 0.623472 -0.330414<br/> C -2.452222 -0.681581 -0.285565<br/> H 1.310577 0.069071 0.356574<br/> H -2.641495 1.439498 -0.544551<br/> H -3.500268 -0.883641 -0.461817<br/> C -0.102483 2.316727 -0.156691<br/> H 0.402626 2.583997 0.771990<br/> H 0.618781 2.438443 -0.965878<br/> H -0.912164 3.025737 -0.317832<br/> C 0.577117 -2.717581 0.481977<br/> H 1.233873 -2.942487 -0.358761<br/> H 1.201261 -2.642104 1.372852<br/> C -0.487204 -3.813305 0.629207<br/> H -0.773764 -4.009320 1.660228<br/> H -1.478596 -3.123870 0.197798<br/> C -0.333747 -5.007483 -0.139925<br/> C -0.217470 -5.995184 -0.814117<br/> H -0.115130 -6.872387 -1.403758</p> | <p>-1856, 34, 43, 102, 163, 213, 251, 267, 368, 408, 419,<br/> 445, 530, 556, 563, 623, 653, 699, 711, 755, 821, 841,<br/> 912, 922, 953, 977, 1012, 1023, 1030, 1069, 1085, 1152,<br/> 1174, 1192, 1258, 1265, 1296, 1315, 1330, 1360, 1416,<br/> 1448, 1480, 1491, 1500, 1504, 1654, 1662, 1677, 2211,<br/> 3053, 3072, 3110, 3111, 3128, 3138, 3165, 3170, 3201,<br/> 3467,</p> |
| <p><b>i1-i12</b></p> <p>C -0.014075 0.000170 -0.021312<br/> C 0.021830 -0.003375 1.375968</p>                                                                                                                                                                                                                                                                                                                                                                                                                                                                                                                                                                                                                                                                                                                                               |                                                                                                                                                                                                                                                                                                                                                                                    |

|                                                                                                                                                                                                                                                                                                                                                                                                                                                                                                                                                                                                                                                                                                                                        |                                                                                                                                                                                                                                                                                                                                                                                    |
|----------------------------------------------------------------------------------------------------------------------------------------------------------------------------------------------------------------------------------------------------------------------------------------------------------------------------------------------------------------------------------------------------------------------------------------------------------------------------------------------------------------------------------------------------------------------------------------------------------------------------------------------------------------------------------------------------------------------------------------|------------------------------------------------------------------------------------------------------------------------------------------------------------------------------------------------------------------------------------------------------------------------------------------------------------------------------------------------------------------------------------|
| <p>C 1.235625 -0.004948 2.042984<br/> C 2.430996 -0.006126 1.341612<br/> C 2.424627 -0.014685 -0.058832<br/> C 1.181334 -0.008870 -0.715273<br/> H 1.253864 0.004060 3.124750<br/> H 1.165639 -0.011796 -1.799363<br/> C 3.630294 -0.033826 -0.852537<br/> H 3.564570 0.179082 -1.910273<br/> C 5.003615 -0.111859 -0.302789<br/> H 4.328085 -1.123213 -0.761740<br/> C 6.131388 0.199808 -1.083064<br/> C 7.091030 0.450060 -1.766756<br/> H 7.939945 0.683272 -2.360636<br/> H 5.125438 -0.257139 0.759662<br/> H 3.364113 0.018132 1.886428<br/> C -1.332905 0.012161 -0.743438<br/> H -1.930824 -0.859006 -0.473052<br/> H -1.911524 0.898227 -0.479530<br/> H -1.193558 0.006831 -1.822795<br/> H -0.905830 0.001061 1.934354</p> | <p>-1712, 63, 75, 117, 124, 212, 225, 248, 297, 403, 410,<br/> 452, 499, 532, 559, 598, 632, 708, 729, 742, 763, 793,<br/> 822, 901, 922, 946, 1009, 1013, 1016, 1043, 1075, 1129,<br/> 1168, 1187, 1201, 1220, 1268, 1319, 1335, 1356, 1421,<br/> 1435, 1490, 1494, 1517, 1544, 1641, 1675, 2184, 2192,<br/> 3063, 3126, 3142, 3164, 3178, 3193, 3199, 3206, 3222,<br/> 3474,</p> |
| <p><b>i1a-i17a</b></p> <p>C -0.017104 0.014240 -0.000855<br/> C 0.031315 0.065827 1.391572<br/> C 1.253209 0.095853 2.049095<br/> C 2.438772 0.070886 1.337780<br/> C 2.424221 0.011015 -0.063052<br/> C 1.176097 -0.008203 -0.704614<br/> H 1.279884 0.147637 3.129495<br/> H 1.150853 -0.047587 -1.787828<br/> C 3.620937 -0.034178 -0.868986<br/> H 3.498251 0.055286 -1.941227<br/> C 4.902596 -0.172424 -0.377945<br/> H 5.079248 -0.380198 0.669940<br/> C 6.089148 -0.121877 -1.185365<br/> C 7.044788 -0.294197 -1.945661<br/> H 7.921562 -0.018743 -2.485365<br/> H 5.795374 0.981492 -0.545916<br/> H 3.377263 0.116839 1.873043<br/> H -0.891040 0.089032 1.958419<br/> C -1.339491 -0.034408 -0.715316</p>                 | <p>-1766, 69, 87, 98, 122, 213, 225, 252, 300, 403, 415, 448,<br/> 489, 526, 534, 580, 626, 647, 713, 784, 787, 799, 829,<br/> 908, 931, 955, 1006, 1011, 1017, 1021, 1040, 1075,<br/> 1134, 1199, 1205, 1260, 1277, 1319, 1333, 1355, 1421,<br/> 1455, 1497, 1505, 1531, 1542, 1610, 1647, 1673, 2025,<br/> 3062, 3125, 3142, 3167, 3179, 3182, 3188, 3195, 3205,<br/> 3422,</p>  |

|                                                                                                                                                                                                                                                                                                                                                                                                                                                                                                                                                                                                                                                                                                                                                                                                                                  |                                                                                                                                                                                                                                                                                                                                                                                    |
|----------------------------------------------------------------------------------------------------------------------------------------------------------------------------------------------------------------------------------------------------------------------------------------------------------------------------------------------------------------------------------------------------------------------------------------------------------------------------------------------------------------------------------------------------------------------------------------------------------------------------------------------------------------------------------------------------------------------------------------------------------------------------------------------------------------------------------|------------------------------------------------------------------------------------------------------------------------------------------------------------------------------------------------------------------------------------------------------------------------------------------------------------------------------------------------------------------------------------|
| <p>H -2.028879 0.708158 -0.313841<br/> H -1.219771 0.149920 -1.781368<br/> H -1.806960 -1.013065 -0.594317</p>                                                                                                                                                                                                                                                                                                                                                                                                                                                                                                                                                                                                                                                                                                                   |                                                                                                                                                                                                                                                                                                                                                                                    |
| <p><b>i1a-i17b</b></p> <p>C 0.048904 0.345081 -0.047892<br/> C -0.045280 -0.051290 1.295577<br/> C 1.149860 -0.238918 2.009528<br/> C 2.388527 -0.050537 1.415248<br/> C 2.446890 0.331874 0.076097<br/> C 1.279634 0.531576 -0.647573<br/> H -0.860321 0.499930 -0.615075<br/> H 1.111431 -0.519375 3.051472<br/> H 3.410741 0.477157 -0.396308<br/> H 1.332141 0.833196 -1.685253<br/> C 3.656555 -0.232953 2.203936<br/> H 4.364789 -0.861139 1.663333<br/> H 4.142176 0.728086 2.380950<br/> H 3.458627 -0.692516 3.170403<br/> C -1.359856 -0.235119 1.859023<br/> H -2.185944 0.038906 1.215498<br/> C -1.732722 -0.775115 3.077015<br/> H -2.787788 -0.770043 3.323598<br/> C -0.919284 -1.345210 4.114733<br/> H -1.440688 -2.187595 3.261603<br/> C -0.243397 -1.629918 5.109084<br/> H 0.263650 -2.308014 5.757644</p> | <p>-1734, 30, 101, 113, 141, 194, 215, 305, 343, 388, 409,<br/> 451, 499, 516, 534, 571, 648, 714, 726, 753, 765, 799,<br/> 838, 907, 915, 941, 985, 1008, 1012, 1016, 1034, 1069,<br/> 1134, 1186, 1195, 1247, 1278, 1326, 1357, 1413, 1421,<br/> 1469, 1493, 1496, 1519, 1544, 1637, 1653, 1669, 2024,<br/> 3054, 3114, 3142, 3172, 3178, 3189, 3193, 3206, 3233,<br/> 3395,</p> |
| <p><b>i1a-i18</b></p> <p>C -0.005535 0.377150 0.150280<br/> C 0.078135 0.285154 1.546886<br/> C 1.343575 0.048800 2.114822<br/> C 2.485816 -0.086584 1.347306<br/> C 2.370502 0.016637 -0.040184<br/> C 1.134852 0.243771 -0.624843<br/> H -0.959543 0.533921 -0.327236<br/> H 1.420360 -0.027981 3.193785<br/> H 3.254098 -0.086040 -0.658300<br/> H 1.055763 0.313218 -1.701787<br/> C 3.826487 -0.338999 1.980232</p>                                                                                                                                                                                                                                                                                                                                                                                                         | <p>-1729, 24, 90, 121, 135, 197, 215, 297, 325, 375, 411,<br/> 451, 494, 511, 544, 569, 650, 708, 716, 764, 788, 804,<br/> 824, 900, 911, 938, 975, 1000, 1014, 1018, 1026, 1067,<br/> 1135, 1188, 1202, 1243, 1269, 1344, 1352, 1414, 1419,</p>                                                                                                                                   |

|                                                                                                                                                                                                                                                                                                                                                                                                                                                                                                                                                                                                                                                                                                                                                                                                                                     |                                                                                                                                                                                                                                                                                                                                                                           |
|-------------------------------------------------------------------------------------------------------------------------------------------------------------------------------------------------------------------------------------------------------------------------------------------------------------------------------------------------------------------------------------------------------------------------------------------------------------------------------------------------------------------------------------------------------------------------------------------------------------------------------------------------------------------------------------------------------------------------------------------------------------------------------------------------------------------------------------|---------------------------------------------------------------------------------------------------------------------------------------------------------------------------------------------------------------------------------------------------------------------------------------------------------------------------------------------------------------------------|
| <p>H 3.744222 -0.418417 3.062708<br/> H 4.264712 -1.264063 1.603832<br/> H 4.522952 0.468489 1.750862<br/> C -1.048146 0.411675 2.438288<br/> H -0.836846 0.240044 3.485968<br/> C -2.352195 0.785222 2.167029<br/> H -3.058372 0.767098 2.988549<br/> C -2.950692 1.185211 0.924123<br/> H -2.538154 2.151257 1.702855<br/> C -3.542940 1.311258 -0.152905<br/> H -3.954917 1.876391 -0.958144</p>                                                                                                                                                                                                                                                                                                                                                                                                                                 | <p>1449, 1489, 1500, 1531, 1540, 1642, 1645, 1674, 2017,<br/> 3055, 3116, 3141, 3162, 3168, 3171, 3191, 3198, 3255,<br/> 3393,</p>                                                                                                                                                                                                                                        |
| <p><b>i2ent</b></p> <p>C -0.785732 -1.584710 -0.171772<br/> C 0.544562 -1.294148 -0.005069<br/> C 1.090291 -0.039985 -0.077443<br/> C 0.240138 1.037552 -0.344018<br/> C -1.116107 0.780470 -0.527341<br/> C -1.627145 -0.508245 -0.442950<br/> H -1.162501 -2.595867 -0.091281<br/> H 2.152321 0.121700 0.071550<br/> H -1.783954 1.605780 -0.740535<br/> H -2.686408 -0.677881 -0.588802<br/> C 0.779803 2.440224 -0.403060<br/> H 1.781354 2.458181 -0.830982<br/> H 0.137980 3.083173 -1.003287<br/> H 0.841682 2.871748 0.597630<br/> C 2.046858 -2.990129 0.281086<br/> H 2.081996 -3.010389 -0.801351<br/> C 3.081105 -2.452970 0.971714<br/> H 3.134983 -2.533227 2.047617<br/> H 3.852230 -1.894404 0.461561<br/> C 1.114025 -3.891620 0.891650<br/> C 0.334980 -4.658986 1.383130<br/> H -0.346915 -5.342907 1.825556</p> | <p>-469, 16, 75, 92, 94, 131, 211, 222, 239, 355, 393, 428,<br/> 490, 514, 539, 561, 649, 695, 698, 721, 785, 788, 881,<br/> 890, 893, 923, 955, 1004, 1010, 1011, 1068, 1076, 1104,<br/> 1115, 1184, 1229, 1284, 1309, 1319, 1415, 1425, 1454,<br/> 1495, 1499, 1513, 1574, 1611, 1681, 2249, 3053, 3114,<br/> 3146, 3166, 3167, 3171, 3174, 3188, 3200, 3270, 3475,</p> |
| <p><b>i2-p4</b></p> <p>C 0.077399 -0.547672 -0.039238<br/> C -0.025744 -0.057525 1.255105<br/> C 1.132357 0.286115 1.949999</p>                                                                                                                                                                                                                                                                                                                                                                                                                                                                                                                                                                                                                                                                                                     |                                                                                                                                                                                                                                                                                                                                                                           |



|                                                                                                                                                                                                                                                                                                                                                                                                                                                                                                                                                                                                                                                                                                                                                                  |                                                                                                                                                                                                                                                                                                                                                                                       |
|------------------------------------------------------------------------------------------------------------------------------------------------------------------------------------------------------------------------------------------------------------------------------------------------------------------------------------------------------------------------------------------------------------------------------------------------------------------------------------------------------------------------------------------------------------------------------------------------------------------------------------------------------------------------------------------------------------------------------------------------------------------|---------------------------------------------------------------------------------------------------------------------------------------------------------------------------------------------------------------------------------------------------------------------------------------------------------------------------------------------------------------------------------------|
| <p>C 2.385701 0.171629 1.367888<br/> C 2.468868 -0.304187 0.059311<br/> C 1.326858 -0.663210 -0.634496<br/> H -0.816682 -0.828966 -0.578727<br/> H 1.050191 0.625802 2.976352<br/> H 3.440628 -0.402107 -0.409329<br/> H 1.405616 -1.037520 -1.646277<br/> C 3.633696 0.519253 2.131247<br/> H 3.399690 1.044170 3.055496<br/> H 4.192926 -0.381575 2.388486<br/> H 4.290681 1.152080 1.534580<br/> C -1.365130 0.133762 1.892763<br/> H -0.990228 -1.055481 3.190611<br/> C -1.650237 1.254467 2.603166<br/> H -2.648316 1.434948 2.973011<br/> H -0.874017 1.966897 2.841945<br/> C -2.452223 -0.685156 1.415845<br/> C -3.350581 -1.357418 0.996720<br/> H -4.150195 -1.956237 0.635474</p>                                                                   | <p>-1125, 46, 115, 124, 154, 208, 221, 293, 349, 394, 424,<br/> 456, 479, 511, 525, 539, 634, 653, 673, 696, 721, 734,<br/> 735, 828, 862, 908, 921, 951, 958, 1017, 1025, 1028,<br/> 1070, 1132, 1142, 1201, 1237, 1311, 1322, 1352, 1417,<br/> 1422, 1475, 1495, 1513, 1538, 1591, 1667, 1687, 2255,<br/> 3060, 3124, 3143, 3162, 3171, 3184, 3200, 3215, 3265,<br/> 3474,</p>      |
| <p><b>i2-i11</b></p> <p>C -0.549405 -1.683756 -0.239719<br/> C 0.168996 -0.574528 0.193103<br/> C -0.499420 0.622496 0.421306<br/> C -1.872561 0.733256 0.229023<br/> C -2.573544 -0.388001 -0.206843<br/> C -1.918516 -1.587825 -0.438353<br/> H -0.030603 -2.614760 -0.432204<br/> H 0.073706 1.486458 0.737919<br/> H -3.641690 -0.315616 -0.372978<br/> H -2.475668 -2.449088 -0.782506<br/> C -2.597061 2.018954 0.518169<br/> H -1.904516 2.816038 0.778972<br/> H -3.191106 2.339534 -0.337808<br/> H -3.284558 1.883982 1.355751<br/> C 1.643978 -0.683959 0.415026<br/> C 2.577692 -0.832660 -0.767192<br/> C 2.533113 0.424692 0.026557<br/> H 1.939156 -1.226812 1.306795<br/> H 2.132552 -0.798554 -1.753269<br/> H 3.447984 -1.465974 -0.662519</p> | <p>-150, -21, 119, 176, 257, 270, 401, 411, 439, 454, 478,<br/> 554, 595, 696, 732, 762, 800, 837, 849, 881, 910, 924,<br/> 957, 992, 1011, 1022, 1045, 1068, 1153, 1183, 1221,<br/> 1230, 1261, 1275, 1280, 1290, 1331, 1341, 1371, 1414,<br/> 1459, 1472, 1491, 1497, 1505, 1556, 1651, 1691, 1744,<br/> 3051, 3059, 3074, 3084, 3110, 3112, 3136, 3155, 3168,<br/> 3170, 3185,</p> |

|                                                                                                                                                                                                                                                                                                                                                                                                                                                                                                                                                                                                                                                                                                                                                                          |                                                                                                                                                                                                                                                                                                                                                           |
|--------------------------------------------------------------------------------------------------------------------------------------------------------------------------------------------------------------------------------------------------------------------------------------------------------------------------------------------------------------------------------------------------------------------------------------------------------------------------------------------------------------------------------------------------------------------------------------------------------------------------------------------------------------------------------------------------------------------------------------------------------------------------|-----------------------------------------------------------------------------------------------------------------------------------------------------------------------------------------------------------------------------------------------------------------------------------------------------------------------------------------------------------|
| C 2.930383 1.627926 0.227104<br>H 3.623354 2.328635 -0.205583                                                                                                                                                                                                                                                                                                                                                                                                                                                                                                                                                                                                                                                                                                            |                                                                                                                                                                                                                                                                                                                                                           |
| <b>i3ent</b><br><br>C -0.452995 0.151733 0.723935<br>C 0.840543 0.236756 0.264427<br>C 1.424935 1.389299 -0.191815<br>C 0.678938 2.573483 -0.165854<br>C -0.631107 2.521077 0.299655<br>C -1.195529 1.328383 0.737811<br>H -0.874759 -0.784446 1.067159<br>H 2.442433 1.390365 -0.566842<br>H -1.222289 3.428126 0.314109<br>H -2.219582 1.315255 1.089086<br>C 1.295069 3.866985 -0.623394<br>H 0.537846 4.636406 -0.763018<br>H 2.015473 4.233655 0.109722<br>H 1.827149 3.734406 -1.565374<br>C 2.007113 -1.685305 -0.043660<br>C 2.144993 -1.708576 -1.254014<br>H 2.159688 -1.544066 -2.304565<br>C 2.143920 -2.218126 1.289183<br>H 2.427676 -3.264640 1.302744<br>C 1.991558 -1.570884 2.438069<br>H 1.714509 -0.527551 2.475437<br>H 2.150617 -2.088085 3.373797 | -468, 28, 62, 76, 96, 110, 183, 214, 244, 342, 363, 430,<br>468, 506, 526, 588, 620, 702, 712, 726, 788, 790, 874,<br>901, 923, 995, 999, 1010, 1011, 1028, 1064, 1070, 1104,<br>1115, 1182, 1226, 1308, 1319, 1329, 1416, 1444, 1453,<br>1494, 1501, 1509, 1609, 1678, 1706, 2067, 3058, 3117,<br>3147, 3165, 3169, 3179, 3183, 3193, 3203, 3266, 3455,  |
| <b>i3-i13</b><br><br>C -2.013204 -0.192353 -0.270132<br>C -0.631924 -0.314386 -0.357103<br>C 0.178202 0.788498 -0.083468<br>C -0.370032 2.008434 0.276889<br>C -1.760286 2.113369 0.359196<br>C -2.573478 1.025746 0.089408<br>H -2.635927 -1.052101 -0.481329<br>H 1.254090 0.679019 -0.160441<br>H -2.203478 3.061969 0.637676<br>H -3.648339 1.126130 0.158410<br>C 0.499591 3.196852 0.581083<br>H 0.410070 3.483784 1.629794<br>H 1.546999 2.981815 0.378364                                                                                                                                                                                                                                                                                                        | -710, 45, 90, 99, 132, 202, 224, 306, 330, 399, 443, 461,<br>515, 532, 549, 589, 644, 689, 716, 732, 802, 823, 880,<br>923, 952, 971, 992, 1020, 1022, 1029, 1070, 1126, 1132,<br>1191, 1197, 1259, 1310, 1314, 1348, 1389, 1417, 1471,<br>1495, 1511, 1515, 1535, 1660, 1687, 1809, 3057, 3119,<br>3148, 3154, 3170, 3176, 3176, 3192, 3207, 3256, 3297, |

|                                                                                                                                                                                                                                                                                                                                                                                                                                                                                                                                                                                                                                                                                                                                                                                                                                    |                                                                                                                                                                                                                                                                                                                                                                                 |
|------------------------------------------------------------------------------------------------------------------------------------------------------------------------------------------------------------------------------------------------------------------------------------------------------------------------------------------------------------------------------------------------------------------------------------------------------------------------------------------------------------------------------------------------------------------------------------------------------------------------------------------------------------------------------------------------------------------------------------------------------------------------------------------------------------------------------------|---------------------------------------------------------------------------------------------------------------------------------------------------------------------------------------------------------------------------------------------------------------------------------------------------------------------------------------------------------------------------------|
| <p>H 0.205832 4.058774 -0.018491<br/> C -0.035062 -1.591004 -0.738212<br/> C -0.640545 -2.901058 -1.114978<br/> C 1.097547 -2.185784 -0.891550<br/> H -0.822498 -3.075606 -2.168026<br/> H 2.166696 -2.268750 -0.830327<br/> C -1.095300 -3.814328 -0.196954<br/> H -1.530336 -4.750983 -0.513218<br/> H -0.978760 -3.637236 0.863419</p>                                                                                                                                                                                                                                                                                                                                                                                                                                                                                          |                                                                                                                                                                                                                                                                                                                                                                                 |
| <p><b>i4ent</b></p> <p>C -0.218197 -0.163804 0.039812<br/> C -0.116046 -0.290263 1.399355<br/> C 1.096753 0.057699 2.006100<br/> C 2.135607 0.508910 1.197878<br/> C 1.986909 0.620944 -0.179972<br/> C 0.782330 0.279644 -0.786643<br/> H -0.940821 -0.649387 2.005786<br/> H 3.079770 0.775943 1.655782<br/> H 2.814652 0.972921 -0.782556<br/> H 0.639261 0.358344 -1.857203<br/> C 1.254060 -0.039615 3.498673<br/> H 2.302839 0.004241 3.787273<br/> H 0.735014 0.781316 3.996419<br/> H 0.833161 -0.970689 3.877642<br/> C -2.246824 -0.696871 -1.074852<br/> H -2.659824 -0.954190 -0.128508<br/> C -2.089640 -0.481313 -2.255720<br/> C -1.777625 -0.209914 -3.612141<br/> H -1.483045 -1.061710 -4.214651<br/> C -1.833039 1.006537 -4.157023<br/> H -2.125386 1.868521 -3.573372<br/> H -1.586733 1.158288 -5.198023</p> | <p>-352, 19, 43, 70, 91, 114, 132, 214, 232, 335, 360, 421,<br/> 490, 521, 565, 577, 678, 696, 699, 716, 782, 807, 877,<br/> 904, 916, 977, 1001, 1005, 1008, 1029, 1070, 1074,<br/> 1114, 1116, 1180, 1226, 1309, 1318, 1321, 1417, 1445,<br/> 1453, 1494, 1501, 1514, 1611, 1672, 1679, 2130, 3062,<br/> 3125, 3144, 3153, 3170, 3170, 3180, 3186, 3193, 3267,<br/> 3427,</p> |
| <p><b>i4-p5</b></p> <p>C -2.493699 0.060347 -0.669904<br/> C -1.257391 0.130267 -0.027431<br/> C -0.495492 1.289849 -0.060204<br/> C -0.997122 2.396725 -0.741248<br/> C -2.225816 2.340649 -1.380534<br/> C -2.977558 1.177370 -1.350928</p>                                                                                                                                                                                                                                                                                                                                                                                                                                                                                                                                                                                      |                                                                                                                                                                                                                                                                                                                                                                                 |

|                                                                                                                                                                                                                                                                                                                                                                                                                                                                                                                                                                                                                                                                                                                                                                                                                            |                                                                                                                                                                                                                                                                                                                                                                             |
|----------------------------------------------------------------------------------------------------------------------------------------------------------------------------------------------------------------------------------------------------------------------------------------------------------------------------------------------------------------------------------------------------------------------------------------------------------------------------------------------------------------------------------------------------------------------------------------------------------------------------------------------------------------------------------------------------------------------------------------------------------------------------------------------------------------------------|-----------------------------------------------------------------------------------------------------------------------------------------------------------------------------------------------------------------------------------------------------------------------------------------------------------------------------------------------------------------------------|
| <p>H -0.896501 -0.738845 0.507974<br/> H -0.418103 3.311791 -0.765113<br/> H -2.603069 3.209750 -1.902277<br/> H -3.936999 1.122362 -1.845608<br/> C 0.850563 1.347116 0.607348<br/> H 1.011322 2.315048 1.080749<br/> H 0.948687 0.572586 1.365742<br/> H 1.648022 1.202071 -0.123495<br/> C -3.273120 -1.150142 -0.662869<br/> H -2.969145 -1.595410 1.177803<br/> C -4.003242 -2.071281 -0.969005<br/> C -4.812664 -3.207963 -1.217856<br/> H -4.289407 -4.119913 -1.482342<br/> C -6.143630 -3.202143 -1.142929<br/> H -6.687158 -2.305538 -0.879260<br/> H -6.711738 -4.098805 -1.345034</p>                                                                                                                                                                                                                          | <p>-780, 56, 57, 108, 129, 154, 198, 213, 251, 348, 356, 432,<br/> 461, 527, 537, 540, 592, 612, 705, 719, 722, 818, 859,<br/> 916, 954, 980, 993, 1017, 1023, 1024, 1032, 1075, 1111,<br/> 1130, 1194, 1215, 1309, 1310, 1325, 1344, 1420, 1449,<br/> 1470, 1498, 1508, 1534, 1656, 1677, 1686, 2258, 3061,<br/> 3124, 3148, 3165, 3174, 3181, 3183, 3196, 3209, 3264,</p> |
| <p><b>i4-i14</b></p> <p>C 0.163085 -0.193658 -0.137050<br/> C 0.185184 0.172332 1.221837<br/> C 1.425744 0.238850 1.889225<br/> C 2.607600 -0.044103 1.230628<br/> C 2.563156 -0.407846 -0.118348<br/> C 1.347804 -0.477921 -0.787368<br/> H -0.781681 -0.243194 -0.659983<br/> H 1.444218 0.523593 2.933547<br/> H 3.484408 -0.631911 -0.640662<br/> H 1.325911 -0.753022 -1.833637<br/> C 3.926756 0.028639 1.949257<br/> H 4.634259 0.649166 1.398815<br/> H 3.811489 0.445645 2.947986<br/> H 4.369295 -0.963932 2.045335<br/> C -1.016841 0.420712 1.918391<br/> C -2.087529 0.862809 2.447145<br/> H -1.838364 -0.371056 2.530848<br/> C -3.180888 1.586885 2.953504<br/> H -4.085385 1.536962 2.358502<br/> C -3.183400 2.252661 4.130416<br/> H -2.297871 2.312846 4.746271<br/> H -4.081326 2.737373 4.481465</p> | <p>-1895, 44, 54, 96, 124, 178, 207, 215, 317, 335, 389, 399,<br/> 452, 506, 533, 555, 585, 634, 697, 704, 797, 843, 851,<br/> 891, 908, 941, 981, 1006, 1008, 1028, 1069, 1094, 1126,<br/> 1191, 1212, 1287, 1294, 1306, 1346, 1415, 1426, 1453,<br/> 1494, 1506, 1521, 1578, 1620, 1657, 2122, 2361, 3057,<br/> 3117, 3147, 3168, 3175, 3182, 3194, 3197, 3211, 3265,</p> |
| <p><b>i4-i22</b></p>                                                                                                                                                                                                                                                                                                                                                                                                                                                                                                                                                                                                                                                                                                                                                                                                       |                                                                                                                                                                                                                                                                                                                                                                             |

|                                                                                                                                                                                                                                                                                                                                                                                                                                                                                                                                                                                                                                                                                                                                                                                                                         |                                                                                                                                                                                                                                                                                                                                                                                    |
|-------------------------------------------------------------------------------------------------------------------------------------------------------------------------------------------------------------------------------------------------------------------------------------------------------------------------------------------------------------------------------------------------------------------------------------------------------------------------------------------------------------------------------------------------------------------------------------------------------------------------------------------------------------------------------------------------------------------------------------------------------------------------------------------------------------------------|------------------------------------------------------------------------------------------------------------------------------------------------------------------------------------------------------------------------------------------------------------------------------------------------------------------------------------------------------------------------------------|
| <p>C -1.829881 -0.228882 -0.269734<br/> C -0.586335 0.182522 0.167709<br/> C -0.220499 1.531682 0.053773<br/> C -1.115459 2.434956 -0.499487<br/> C -2.384826 2.032751 -0.949604<br/> C -2.699099 0.712658 -0.818475<br/> H 0.110726 -0.528361 0.598172<br/> H -0.829763 3.476239 -0.586073<br/> H -3.067788 2.754468 -1.377528<br/> H -3.734422 -0.178548 -1.077520<br/> C 1.132789 1.978445 0.535727<br/> H 1.928183 1.437809 0.021217<br/> H 1.281531 3.042842 0.364724<br/> H 1.247698 1.787592 1.603573<br/> C -2.456769 -1.560448 -0.270386<br/> H -1.968665 -2.450502 0.110183<br/> C -3.681457 -1.525907 -0.791623<br/> C -4.709219 -2.498773 -1.032079<br/> H -4.479030 -3.521237 -0.737774<br/> C -5.890966 -2.221279 -1.579428<br/> H -6.140682 -1.211763 -1.879420<br/> H -6.632535 -2.990866 -1.738680</p> | <p>-1876, 66, 98, 111, 112, 213, 261, 262, 312, 393, 403,<br/> 424, 533, 554, 587, 649, 694, 731, 776, 826, 874, 933,<br/> 937, 970, 973, 977, 1005, 1017, 1027, 1072, 1082, 1136,<br/> 1159, 1184, 1217, 1260, 1299, 1313, 1365, 1417, 1438,<br/> 1458, 1492, 1493, 1506, 1652, 1656, 1669, 1711, 1758,<br/> 3056, 3118, 3126, 3141, 3166, 3168, 3172, 3181, 3207,<br/> 3260,</p> |
| <p><b>i5-i7</b></p> <p>C 0.000133 0.014624 0.001273<br/> C -0.015756 0.029335 1.396799<br/> C 1.170997 0.045564 2.116361<br/> C 2.392520 0.041623 1.458727<br/> C 2.451892 0.021380 0.063284<br/> C 1.243533 0.020899 -0.597897<br/> C -1.277832 0.011907 -0.801379<br/> C -1.331219 -1.124388 -1.847332<br/> C -0.101991 -1.063132 -2.630831<br/> C 1.064838 -0.735845 -2.740805<br/> H -0.965958 0.031408 1.918174<br/> H 1.143123 0.057820 3.197368<br/> H -1.367852 0.959328 -1.336464<br/> H -2.133250 -0.071034 -0.130961<br/> H -1.394033 -2.096482 -1.353884<br/> H -2.218779 -1.015268 -2.470552</p>                                                                                                                                                                                                           | <p>-491, 58, 76, 114, 169, 216, 261, 334, 367, 402, 472, 496,<br/> 514, 535, 615, 696, 710, 735, 764, 800, 835, 901, 924,<br/> 969, 986, 1002, 1003, 1028, 1048, 1061, 1121, 1185,<br/> 1188, 1208, 1268, 1286, 1327, 1333, 1370, 1408, 1446,<br/> 1471, 1481, 1486, 1500, 1508, 1627, 1677, 2079, 3047,<br/> 3058, 3063, 3101, 3109, 3112, 3133, 3162, 3175, 3200,<br/> 3430,</p> |

|                                                                                                                                                                                                                                                                                                                                                                                                                                                                                                                                                                                                                                                                                                                                                                                                                                        |                                                                                                                                                                                                                                                                                                                                                                                   |
|----------------------------------------------------------------------------------------------------------------------------------------------------------------------------------------------------------------------------------------------------------------------------------------------------------------------------------------------------------------------------------------------------------------------------------------------------------------------------------------------------------------------------------------------------------------------------------------------------------------------------------------------------------------------------------------------------------------------------------------------------------------------------------------------------------------------------------------|-----------------------------------------------------------------------------------------------------------------------------------------------------------------------------------------------------------------------------------------------------------------------------------------------------------------------------------------------------------------------------------|
| <p>H 2.042467 -0.590088 -3.138639<br/> C 3.761571 -0.010648 -0.675818<br/> H 4.599465 0.112298 0.008053<br/> H 3.886260 -0.962795 -1.194966<br/> H 3.808611 0.782512 -1.422277<br/> H 3.314718 0.051686 2.028043</p>                                                                                                                                                                                                                                                                                                                                                                                                                                                                                                                                                                                                                   |                                                                                                                                                                                                                                                                                                                                                                                   |
| <p><b>i6-i8</b></p> <p>C -5.210692 -1.227347 -0.368243<br/> C -4.763059 -2.335867 -0.436330<br/> C -2.648170 0.263279 0.658975<br/> C -3.619078 1.233804 0.564912<br/> C -5.071519 0.954141 0.843206<br/> C -5.738906 0.130519 -0.273272<br/> H -0.603466 -0.364968 0.487171<br/> H -4.365827 -3.319281 -0.4964i5<br/> C -1.318866 0.441438 0.393787<br/> C -3.175519 2.494644 0.166235<br/> H -5.606856 1.898588 0.942672<br/> H -6.813530 0.078035 -0.090175<br/> C -1.834951 2.750826 -0.119871<br/> C -0.913267 1.716644 -0.001147<br/> H -3.896498 3.302423 0.082702<br/> H 0.131655 1.904544 -0.217144<br/> C -1.404899 4.120888 -0.570361<br/> H -1.895102 4.900261 0.012551<br/> H -0.328320 4.246948 -0.470002<br/> H -1.662771 4.284535 -1.618237<br/> H -5.598499 0.636428 -1.230663<br/> H -5.172271 0.412568 1.784052</p> | <p>-43, 23, 77, 122, 166, 226, 276, 301, 358, 403, 438, 517,<br/> 522, 546, 619, 709, 717, 722, 734, 818, 837, 891, 914,<br/> 959, 976, 1004, 1008, 1034, 1050, 1070, 1144, 1184,<br/> 1189, 1238, 1272, 1300, 1324, 1352, 1372, 1416, 1436,<br/> 1476, 1488, 1493, 1496, 1501, 1639, 1669, 2258, 3056,<br/> 3060, 3066, 3104, 3118, 3118, 3137, 3156, 3174, 3196,<br/> 3473,</p> |
| <p><b>i7-i9</b></p> <p>C -4.865689 -1.458032 -0.432260<br/> C -3.629566 -1.469474 0.140549<br/> C -2.847711 -0.242388 -0.000199<br/> C -3.552173 0.975690 -0.047308<br/> C -5.059143 0.956920 0.133992<br/> C -5.614531 -0.273981 -0.537981<br/> H -3.195739 -2.353627 0.585972<br/> C -1.445869 -0.240871 -0.090390<br/> C -2.863662 2.168128 -0.194357</p>                                                                                                                                                                                                                                                                                                                                                                                                                                                                           | <p>-1603, 119, 144, 173, 232, 273, 292, 412, 463, 468, 492,<br/> 521, 543, 583, 677, 697, 750, 766, 794, 808, 864, 917,<br/> 941, 965, 998, 1007, 1053, 1068, 1100, 1114, 1188,<br/> 1191, 1207, 1224, 1258, 1286, 1293, 1321, 1346, 1404,<br/> 1420, 1453, 1457, 1488, 1493, 1510, 1530, 1643, 1668,<br/> 2154, 3022, 3052, 3109, 3109, 3142, 3163, 3174, 3180,</p>              |

|                                                                                                                                                                                                                                                                                                                                                                                                                                                                                                                                                                                                                                                                                                                                                                                                                                           |                                                                                                                                                                                                                                                                                                                                                                                      |
|-------------------------------------------------------------------------------------------------------------------------------------------------------------------------------------------------------------------------------------------------------------------------------------------------------------------------------------------------------------------------------------------------------------------------------------------------------------------------------------------------------------------------------------------------------------------------------------------------------------------------------------------------------------------------------------------------------------------------------------------------------------------------------------------------------------------------------------------|--------------------------------------------------------------------------------------------------------------------------------------------------------------------------------------------------------------------------------------------------------------------------------------------------------------------------------------------------------------------------------------|
| <p>H -5.512764 1.864691 -0.261886<br/> H -6.033963 -1.336915 0.129672<br/> C -1.478358 2.169405 -0.281735<br/> C -0.781393 0.971024 -0.223836<br/> H -3.411768 3.101573 -0.230704<br/> H 0.299335 0.974303 -0.292423<br/> H -6.416168 -0.204421 -1.264640<br/> H -5.283864 0.929265 1.206434<br/> H -0.943947 3.102831 -0.394581<br/> C -0.683899 -1.534973 -0.051059<br/> H -0.802991 -2.033850 0.913094<br/> H -1.044647 -2.224154 -0.815766<br/> H 0.378682 -1.364766 -0.212162</p>                                                                                                                                                                                                                                                                                                                                                    | <p>3196, 3202,</p>                                                                                                                                                                                                                                                                                                                                                                   |
| <p><b>i8-i10</b></p> <p>C -4.767508 -1.536909 0.376274<br/> C -3.693909 -1.407651 -0.452278<br/> C -2.902160 -0.192470 -0.287274<br/> C -3.563379 0.976977 0.139087<br/> C -5.070624 0.938873 0.311165<br/> C -5.464922 -0.413318 0.853386<br/> H -1.016545 -1.023863 -0.866125<br/> H -3.359653 -2.187861 -1.122787<br/> C -1.531994 -0.130512 -0.535902<br/> C -2.843985 2.142948 0.323119<br/> H -5.538115 1.100174 -0.666891<br/> H -6.077186 -0.499286 1.744150<br/> C -1.470387 2.202835 0.083522<br/> C -0.829592 1.050342 -0.358137<br/> H -3.361905 3.039015 0.649563<br/> H 0.234000 1.077699 -0.560144<br/> C -0.713946 3.481773 0.309681<br/> H 0.293358 3.419995 -0.098234<br/> H -1.220523 4.326386 -0.158034<br/> H -0.630861 3.701394 1.375712<br/> H -6.034022 -1.359494 0.125051<br/> H -5.413549 1.742070 0.962351</p> | <p>-1616, 73, 104, 172, 216, 263, 331, 406, 412, 450, 478,<br/> 505, 571, 592, 683, 724, 736, 782, 794, 821, 861, 910,<br/> 932, 963, 989, 1004, 1022, 1067, 1095, 1146, 1174,<br/> 1194, 1220, 1238, 1264, 1283, 1291, 1329, 1341, 1398,<br/> 1415, 1454, 1467, 1477, 1495, 1507, 1542, 1636, 1684,<br/> 2150, 3032, 3051, 3104, 3112, 3139, 3156, 3161, 3173,<br/> 3187, 3190,</p> |
| <p><b>i9-p1</b></p> <p>C 0.050782 0.114108 0.054905<br/> C 0.108462 -0.031095 1.427908</p>                                                                                                                                                                                                                                                                                                                                                                                                                                                                                                                                                                                                                                                                                                                                                |                                                                                                                                                                                                                                                                                                                                                                                      |

|                                                                                                                                                                                                                                                                                                                                                                                                                                                                                                                                                                                                                                                                                                                                           |                                                                                                                                                                                                                                                                                                                                                                                       |
|-------------------------------------------------------------------------------------------------------------------------------------------------------------------------------------------------------------------------------------------------------------------------------------------------------------------------------------------------------------------------------------------------------------------------------------------------------------------------------------------------------------------------------------------------------------------------------------------------------------------------------------------------------------------------------------------------------------------------------------------|---------------------------------------------------------------------------------------------------------------------------------------------------------------------------------------------------------------------------------------------------------------------------------------------------------------------------------------------------------------------------------------|
| <p>C 1.367921 -0.025076 2.100991<br/> C 2.559387 0.000331 1.335731<br/> C 2.455326 0.062190 -0.077519<br/> C 1.234055 0.131611 -0.696872<br/> H -0.790833 0.065118 2.023060<br/> C 1.441071 -0.071732 3.508681<br/> C 3.819375 -0.022412 2.002747<br/> H 1.180810 0.207363 -1.774544<br/> C 3.842486 -0.063886 3.372299<br/> C 2.655657 -0.087852 4.132193<br/> H 2.715018 -0.122202 5.211585<br/> H 3.356444 0.075863 -0.674440<br/> H 0.521714 -0.100254 4.079951<br/> H -0.907716 0.176317 -0.441446<br/> H 4.796478 -0.080141 3.884303<br/> C 5.097750 0.001744 1.214406<br/> H 5.958047 -0.022123 1.879659<br/> H 5.164009 -0.854906 0.541538<br/> H 5.167027 0.902076 0.601361<br/> H -0.225431 -1.852952 1.571457</p>              | <p>-893, 128, 168, 212, 240, 281, 290, 391, 446, 461, 487,<br/> 488, 521, 570, 579, 650, 722, 760, 804, 815, 831, 880,<br/> 910, 936, 1000, 1007, 1014, 1034, 1055, 1066, 1086,<br/> 1108, 1164, 1188, 1194, 1236, 1270, 1293, 1379, 1407,<br/> 1416, 1434, 1470, 1492, 1504, 1511, 1562, 1644, 1663,<br/> 1695, 3050, 3107, 3144, 3173, 3175, 3187, 3192, 3206,<br/> 3206, 3225,</p> |
| <p><b>i10-p2</b></p> <p>C -4.968240 -1.655513 -0.154871<br/> C -3.598462 -1.645014 -0.188179<br/> C -2.883696 -0.423608 -0.244809<br/> C -3.597054 0.796172 -0.232834<br/> C -5.020867 0.760304 -0.120918<br/> C -5.687792 -0.450266 -0.149612<br/> H -3.041658 -2.573595 -0.193412<br/> C -1.471329 -0.378094 -0.327970<br/> C -2.887567 2.013867 -0.301899<br/> H -5.569716 1.686767 -0.232614<br/> H -6.768628 -0.468099 -0.130524<br/> C -1.520698 2.043990 -0.385823<br/> C -0.814672 0.815759 -0.397301<br/> H -3.448678 2.941455 -0.280892<br/> H 0.266581 0.835918 -0.461735<br/> H -5.116285 1.153610 1.690556<br/> H -0.919423 -1.309811 -0.336850<br/> H -5.502572 -2.595587 -0.139779<br/> C -0.757836 3.335041 -0.464282</p> | <p>-889, 90, 119, 179, 246, 262, 308, 390, 415, 428, 457,<br/> 514, 528, 536, 632, 657, 716, 772, 795, 807, 853, 899,<br/> 907, 930, 972, 1001, 1013, 1026, 1035, 1058, 1070,<br/> 1150, 1164, 1182, 1202, 1238, 1280, 1293, 1389, 1400,<br/> 1415, 1423, 1470, 1489, 1501, 1515, 1562, 1635, 1662,<br/> 1709, 3051, 3109, 3141, 3172, 3173, 3175, 3183, 3191,<br/> 3195, 3207,</p>   |



|                                                                                                                                                                                                                                                                                                                                                                                                                                                                                                                                                                                                                                                                                                                                                                                                                                       |                                                                                                                                                                                                                                                                                                                                                                                   |
|---------------------------------------------------------------------------------------------------------------------------------------------------------------------------------------------------------------------------------------------------------------------------------------------------------------------------------------------------------------------------------------------------------------------------------------------------------------------------------------------------------------------------------------------------------------------------------------------------------------------------------------------------------------------------------------------------------------------------------------------------------------------------------------------------------------------------------------|-----------------------------------------------------------------------------------------------------------------------------------------------------------------------------------------------------------------------------------------------------------------------------------------------------------------------------------------------------------------------------------|
| <p>H -0.178499 3.386226 -1.387558<br/> H -1.426242 4.193109 -0.433260<br/> H -0.053199 3.419639 0.364355</p>                                                                                                                                                                                                                                                                                                                                                                                                                                                                                                                                                                                                                                                                                                                          |                                                                                                                                                                                                                                                                                                                                                                                   |
| <p><b>i11-i12</b></p> <p>C -0.516010 -1.814181 0.139103<br/> C 0.226660 -0.689180 -0.234513<br/> C -0.450505 0.524919 -0.407085<br/> C -1.822300 0.624702 -0.232838<br/> C -2.539024 -0.515198 0.130277<br/> C -1.885751 -1.724370 0.315267<br/> H -0.009431 -2.759546 0.286148<br/> H 0.106658 1.419253 -0.659667<br/> H -3.610220 -0.448758 0.274278<br/> H -2.448586 -2.603061 0.601206<br/> C -2.534032 1.932306 -0.446669<br/> H -3.032724 1.945505 -1.417507<br/> H -3.297336 2.090864 0.314503<br/> H -1.839955 2.770414 -0.416480<br/> C 1.661770 -0.811522 -0.408244<br/> C 2.524392 0.228449 -1.049823<br/> C 2.650756 0.397210 0.380738<br/> H 2.100504 -1.790151 -0.277797<br/> H 2.017485 1.022411 -1.587735<br/> H 3.408097 -0.137001 -1.561018<br/> C 2.912997 0.756150 1.539712<br/> H 2.813662 0.677190 2.599942</p> | <p>-740, 43, 56, 85, 185, 210, 222, 323, 349, 398, 427, 456,<br/> 534, 542, 561, 584, 708, 720, 738, 803, 831, 905, 908,<br/> 929, 934, 1001, 1017, 1018, 1034, 1068, 1088, 1116,<br/> 1145, 1160, 1196, 1214, 1272, 1318, 1353, 1411, 1421,<br/> 1470, 1475, 1494, 1510, 1543, 1649, 1674, 1929, 3051,<br/> 3114, 3115, 3141, 3179, 3187, 3188, 3195, 3214, 3223,<br/> 3376,</p> |
| <p><b>i12-p3</b></p> <p>C -0.888147 -0.735345 -0.752458<br/> C 0.284419 -0.956926 -0.021242<br/> C 1.303005 -0.018203 0.017579<br/> C 1.142934 1.171183 -0.694419<br/> C -0.015917 1.415325 -1.413035<br/> C -1.030464 0.472308 -1.437438<br/> H 0.395034 -1.871355 0.548989<br/> H 1.933233 1.911712 -0.674213<br/> H -0.130034 2.344851 -1.954145<br/> H -1.937965 0.661516 -1.996611<br/> C 2.546663 -0.252835 0.829377</p>                                                                                                                                                                                                                                                                                                                                                                                                        | <p>-801, 76, 88, 102, 125, 207, 218, 242, 296, 346, 388, 414,<br/> 450, 487, 507, 532, 577, 635, 680, 717, 735, 773, 809,<br/> 898, 909, 949, 972, 1001, 1017, 1020, 1031, 1034, 1074,<br/> 1130, 1192, 1195, 1268, 1308, 1313, 1345, 1352, 1420,</p>                                                                                                                             |

|                                                                                                                                                                                                                                                                                                                                                                                                                                                                                                                                                                                                                                                                                                                                                                                                                     |                                                                                                                                                                                                                                                                                                                                                                                    |
|---------------------------------------------------------------------------------------------------------------------------------------------------------------------------------------------------------------------------------------------------------------------------------------------------------------------------------------------------------------------------------------------------------------------------------------------------------------------------------------------------------------------------------------------------------------------------------------------------------------------------------------------------------------------------------------------------------------------------------------------------------------------------------------------------------------------|------------------------------------------------------------------------------------------------------------------------------------------------------------------------------------------------------------------------------------------------------------------------------------------------------------------------------------------------------------------------------------|
| <p>H 2.617875 -1.288932 1.154632<br/> H 3.439577 -0.011565 0.252952<br/> H 2.551153 0.379253 1.718791<br/> C -1.965900 -1.712265 -0.804336<br/> H -2.920677 -1.361917 -1.178987<br/> C -1.876536 -2.995603 -0.387699<br/> H -0.913764 -3.425048 -0.139931<br/> H -1.898910 -2.761432 1.558945<br/> C -2.964133 -3.912787 -0.494351<br/> C -3.866004 -4.698059 -0.582024<br/> H -4.666771 -5.391437 -0.660576</p>                                                                                                                                                                                                                                                                                                                                                                                                    | <p>1475, 1493, 1511, 1536, 1638, 1660, 1684, 2248, 3062,<br/> 3125, 3143, 3167, 3168, 3179, 3182, 3198, 3200, 3474,</p>                                                                                                                                                                                                                                                            |
| <p><b>i12-i25</b></p> <p>C 0.005211 0.475359 -0.078379<br/> C 0.503355 0.662408 1.049929<br/> C 2.313667 -0.138754 0.882151<br/> C 2.769903 0.329660 -0.429457<br/> C 1.952869 0.249974 -1.512221<br/> C 0.480498 -0.066011 -1.370271<br/> H 2.816830 -0.173247 2.993708<br/> H 0.363061 1.018094 2.049348<br/> C 3.123140 0.190265 2.020777<br/> C 4.035382 1.021191 -0.497571<br/> H 2.306128 0.584369 -2.479313<br/> H -0.069395 0.346992 -2.214817<br/> C 4.749235 1.336657 0.607161<br/> C 4.255537 0.923221 1.895003<br/> H 4.380322 1.339238 -1.475001<br/> H 4.840739 1.168009 2.773562<br/> C 6.036791 2.104439 0.542404<br/> H 5.951324 3.052894 1.076316<br/> H 6.847541 1.543798 1.011707<br/> H 6.318564 2.317941 -0.486934<br/> H 1.841331 -1.113855 0.911653<br/> H 0.292381 -1.147037 -1.375110</p> | <p>-952, 91, 101, 133, 202, 268, 286, 355, 378, 425, 442,<br/> 483, 552, 563, 653, 678, 680, 738, 788, 798, 828, 893,<br/> 910, 931, 949, 975, 1002, 1011, 1035, 1059, 1071, 1115,<br/> 1187, 1199, 1209, 1232, 1296, 1326, 1370, 1398, 1417,<br/> 1459, 1479, 1487, 1498, 1522, 1590, 1693, 1890, 3013,<br/> 3046, 3100, 3101, 3136, 3142, 3173, 3179, 3193, 3199,<br/> 3353,</p> |
| <p><b>i12-i26</b></p> <p>C -0.029186 0.504187 -0.141270<br/> C 0.428147 0.814811 0.976887<br/> C 2.264235 0.062498 0.947025<br/> C 2.748096 0.421314 -0.388893</p>                                                                                                                                                                                                                                                                                                                                                                                                                                                                                                                                                                                                                                                  |                                                                                                                                                                                                                                                                                                                                                                                    |

|                                                                                                                                                                                                                                                                                                                                                                                                                                                                                                                                                                                                                                                                                                                                                            |                                                                                                                                                                                                                                                                                                                                                                                   |
|------------------------------------------------------------------------------------------------------------------------------------------------------------------------------------------------------------------------------------------------------------------------------------------------------------------------------------------------------------------------------------------------------------------------------------------------------------------------------------------------------------------------------------------------------------------------------------------------------------------------------------------------------------------------------------------------------------------------------------------------------------|-----------------------------------------------------------------------------------------------------------------------------------------------------------------------------------------------------------------------------------------------------------------------------------------------------------------------------------------------------------------------------------|
| <p>C 1.970623 0.210461 -1.484964<br/> C 0.506157 -0.142734 -1.359189<br/> H 0.239676 1.265303 1.929832<br/> C 3.007099 0.507418 2.098168<br/> C 3.989199 1.147832 -0.481969<br/> H 2.347307 0.463151 -2.467910<br/> H -0.028658 0.163794 -2.256899<br/> C 4.633933 1.571559 0.627553<br/> C 4.123907 1.265212 1.929575<br/> H 4.363565 1.389650 -1.468680<br/> H 4.674264 1.600040 2.800272<br/> H 1.821204 -0.923391 1.049664<br/> H 0.355331 -1.225293 -1.261511<br/> C 2.516863 0.096975 3.453950<br/> H 1.552077 0.556810 3.682572<br/> H 2.368749 -0.983889 3.500746<br/> H 3.219028 0.384161 4.234067<br/> H 5.546731 2.145057 0.542417</p>                                                                                                          | <p>-946, 78, 109, 149, 192, 239, 291, 355, 402, 443, 461,<br/> 514, 524, 544, 654, 662, 684, 743, 752, 797, 825, 905,<br/> 906, 930, 966, 979, 997, 1017, 1035, 1051, 1080, 1096,<br/> 1182, 1190, 1209, 1230, 1300, 1328, 1385, 1390, 1416,<br/> 1453, 1464, 1481, 1496, 1545, 1596, 1679, 1897, 3019,<br/> 3038, 3092, 3107, 3132, 3141, 3175, 3180, 3182, 3202,<br/> 3347,</p> |
| <p><b>i13-i14</b></p> <p>C -1.824496 -0.409919 0.565504<br/> C -0.475214 -0.469106 0.189871<br/> C 0.218817 0.726232 -0.058935<br/> C -0.403461 1.955992 0.073899<br/> C -1.746484 1.993115 0.451697<br/> C -2.445677 0.819413 0.693259<br/> H -2.364758 -1.328538 0.747833<br/> H 1.258111 0.676655 -0.358035<br/> H -2.243210 2.949910 0.554122<br/> H -3.486911 0.863125 0.983673<br/> C 0.350595 3.234766 -0.167116<br/> H 0.538543 3.754418 0.773760<br/> H 1.310359 3.045564 -0.644123<br/> H -0.222306 3.908916 -0.803709<br/> C 0.159472 -1.721679 0.009172<br/> C 0.091704 -3.050777 -1.213175<br/> C 0.812459 -2.820844 0.068183<br/> H 0.590238 -2.755789 -2.128209<br/> H 1.464167 -3.390246 0.715816<br/> C -1.092674 -3.766586 -1.299959</p> | <p>-676, 35, 66, 108, 124, 201, 213, 281, 348, 420, 440, 450,<br/> 511, 532, 552, 570, 711, 720, 740, 770, 808, 902, 905,<br/> 922, 929, 959, 1012, 1014, 1019, 1067, 1079, 1129,<br/> 1144, 1178, 1194, 1246, 1276, 1302, 1346, 1381, 1416,<br/> 1456, 1494, 1501, 1508, 1526, 1636, 1665, 1938, 3055,<br/> 3118, 3145, 3158, 3161, 3183, 3190, 3195, 3197, 3210,<br/> 3264,</p> |

|                                                                                                                                                                                                                                                                                                                                                                                                                                                                                                                                                                                                                                                                                                                                                                                                                                      |                                                                                                                                                                                                                                                                                                                                                                            |
|--------------------------------------------------------------------------------------------------------------------------------------------------------------------------------------------------------------------------------------------------------------------------------------------------------------------------------------------------------------------------------------------------------------------------------------------------------------------------------------------------------------------------------------------------------------------------------------------------------------------------------------------------------------------------------------------------------------------------------------------------------------------------------------------------------------------------------------|----------------------------------------------------------------------------------------------------------------------------------------------------------------------------------------------------------------------------------------------------------------------------------------------------------------------------------------------------------------------------|
| <p>H -1.570642 -3.933605 -2.253487<br/> H -1.577609 -4.143773 -0.410387</p>                                                                                                                                                                                                                                                                                                                                                                                                                                                                                                                                                                                                                                                                                                                                                          |                                                                                                                                                                                                                                                                                                                                                                            |
| <p><b>i14-p5</b></p> <p>C -2.185940 -1.532641 1.832243<br/> C -0.971956 -1.772984 1.185043<br/> C -0.580290 -0.944920 0.127786<br/> C -1.377535 0.110251 -0.289643<br/> C -2.583624 0.335186 0.371891<br/> C -2.983891 -0.479009 1.420568<br/> H -2.487853 -2.171639 2.649836<br/> H 0.363736 -1.138834 -0.364947<br/> H -3.213004 1.159852 0.060459<br/> H -3.923309 -0.289730 1.921921<br/> C -0.964358 0.982969 -1.442290<br/> H -1.161273 2.032896 -1.227578<br/> H 0.095413 0.869914 -1.662580<br/> H -1.523411 0.721447 -2.342186<br/> C -0.134429 -2.848978 1.593828<br/> C 0.563014 -3.815382 1.826814<br/> H 0.188276 -4.841918 0.210405<br/> C 1.460866 -4.739228 2.455981<br/> H 1.629761 -4.546699 3.509982<br/> C 2.085107 -5.753800 1.868568<br/> H 1.938705 -5.979737 0.821312<br/> H 2.758331 -6.380920 2.435266</p> | <p>-683, 32, 72, 74, 108, 110, 211, 234, 275, 328, 371, 417,<br/> 461, 531, 543, 556, 578, 624, 709, 716, 722, 816, 861,<br/> 919, 948, 984, 990, 1017, 1020, 1022, 1030, 1073, 1109,<br/> 1136, 1202, 1221, 1306, 1318, 1329, 1355, 1419, 1449,<br/> 1468, 1494, 1510, 1545, 1657, 1683, 1714, 2266, 3060,<br/> 3124, 3144, 3161, 3170, 3180, 3193, 3198, 3214, 3258,</p> |
| <p><b>i14-i17</b></p> <p>C -0.001432 -0.206346 -0.117821<br/> C -0.101798 -0.017294 1.265960<br/> C 1.069581 0.070065 2.020588<br/> C 2.324191 -0.000160 1.428462<br/> C 2.397763 -0.176060 0.050000<br/> C 1.243253 -0.278532 -0.715748<br/> H -0.903312 -0.307842 -0.706498<br/> H 0.989138 0.197372 3.093921<br/> H 3.367899 -0.245886 -0.426239<br/> H 1.318510 -0.428243 -1.784599<br/> C 3.570813 0.133134 2.258863<br/> H 3.821898 1.184444 2.410506</p>                                                                                                                                                                                                                                                                                                                                                                      | <p>-1898, 26, 94, 95, 104, 211, 284, 314, 338, 395, 448, 461,<br/> 532, 567, 637, 655, 717, 721, 808, 825, 857, 917, 930,<br/> 937, 942, 958, 1006, 1014, 1021, 1034, 1070, 1072,<br/> 1130, 1179, 1192, 1219, 1273, 1304, 1317, 1345, 1417,</p>                                                                                                                           |

|                                                                                                                                                                                                                                                                                                                                                                                                                                                                                                                                                                                                                                                                                                                                                                                                                                         |                                                                                                                                                                                                                                                                                                                                                                                   |
|-----------------------------------------------------------------------------------------------------------------------------------------------------------------------------------------------------------------------------------------------------------------------------------------------------------------------------------------------------------------------------------------------------------------------------------------------------------------------------------------------------------------------------------------------------------------------------------------------------------------------------------------------------------------------------------------------------------------------------------------------------------------------------------------------------------------------------------------|-----------------------------------------------------------------------------------------------------------------------------------------------------------------------------------------------------------------------------------------------------------------------------------------------------------------------------------------------------------------------------------|
| <p>H 3.438654 -0.317915 3.241445<br/> H 4.420211 -0.343969 1.772701<br/> C -1.390862 0.077331 1.908372<br/> H -1.690504 -0.298339 3.200429<br/> C -2.615663 0.462842 1.572688<br/> H -2.895864 0.892782 0.618651<br/> C -3.573600 0.251796 2.690516<br/> H -4.627411 0.490004 2.614480<br/> C -2.981419 -0.254315 3.756869<br/> H -3.316220 -0.568516 4.732612</p>                                                                                                                                                                                                                                                                                                                                                                                                                                                                      | <p>1461, 1501, 1503, 1529, 1624, 1651, 1676, 1706, 1745,<br/> 3056, 3121, 3149, 3168, 3177, 3177, 3182, 3186, 3202,<br/> 3249,</p>                                                                                                                                                                                                                                                |
| <p><b>i15-i16</b></p> <p>C -2.617492 -2.300658 0.213595<br/> C -1.226625 -2.414304 0.214761<br/> C -0.457687 -1.250433 0.156151<br/> C -1.039704 0.008911 0.117869<br/> C -2.430015 0.094683 0.143378<br/> C -3.212368 -1.050475 0.189800<br/> H -3.224446 -3.196665 0.215159<br/> H 0.623386 -1.338013 0.149406<br/> H -2.902182 1.069247 0.118613<br/> H -4.290705 -0.964740 0.196868<br/> C -0.194415 1.249290 0.025263<br/> H -0.035485 1.529605 -1.017678<br/> H -0.674953 2.090502 0.522822<br/> H 0.783662 1.095042 0.478349<br/> C -0.576892 -3.725729 0.273162<br/> C -1.180857 -4.884799 0.799702<br/> C -0.314047 -5.333091 -1.120146<br/> H 0.503494 -3.710755 0.219370<br/> C -0.690510 -5.957827 0.014997<br/> H -2.007984 -4.891979 1.498092<br/> H 0.196675 -5.606042 -2.035907<br/> H -0.629297 -7.010320 0.264644</p> | <p>-622, 55, 90, 101, 149, 220, 294, 321, 394, 430, 458, 530,<br/> 574, 592, 669, 702, 726, 752, 786, 824, 832, 906, 918,<br/> 924, 953, 970, 1020, 1023, 1028, 1066, 1071, 1131,<br/> 1170, 1192, 1200, 1258, 1279, 1330, 1348, 1355, 1416,<br/> 1443, 1480, 1501, 1503, 1540, 1542, 1663, 1684, 3055,<br/> 3121, 3149, 3161, 3167, 3168, 3177, 3180, 3193, 3195,<br/> 3214,</p> |
| <p><b>i16-i17</b></p> <p>C -2.617312 -2.272861 -0.122686<br/> C -1.237547 -2.395263 -0.286299<br/> C -0.455921 -1.237303 -0.292466<br/> C -1.018728 0.024103 -0.165835</p>                                                                                                                                                                                                                                                                                                                                                                                                                                                                                                                                                                                                                                                              |                                                                                                                                                                                                                                                                                                                                                                                   |

|                                                                                                                                                                                                                                                                                                                                                                                                                                                                                                                                                                                                                                                                                                                                                                          |                                                                                                                                                                                                                                                                                                                                                                                   |
|--------------------------------------------------------------------------------------------------------------------------------------------------------------------------------------------------------------------------------------------------------------------------------------------------------------------------------------------------------------------------------------------------------------------------------------------------------------------------------------------------------------------------------------------------------------------------------------------------------------------------------------------------------------------------------------------------------------------------------------------------------------------------|-----------------------------------------------------------------------------------------------------------------------------------------------------------------------------------------------------------------------------------------------------------------------------------------------------------------------------------------------------------------------------------|
| <p>C -2.402204 0.118864 -0.021376<br/> C -3.194443 -1.019124 -0.000338<br/> H -3.227528 -3.165172 -0.070388<br/> H 0.618606 -1.332579 -0.405210<br/> H -2.858436 1.095438 0.087806<br/> H -4.264675 -0.927107 0.128235<br/> C -0.168998 1.264253 -0.206121<br/> H 0.877818 1.032499 -0.017948<br/> H -0.235130 1.745314 -1.183549<br/> H -0.499588 1.988775 0.537647<br/> C -0.610600 -3.709541 -0.441660<br/> C -0.220034 -5.353147 0.877138<br/> C -1.278896 -4.850167 -0.929274<br/> H 0.469529 -3.704379 -0.502407<br/> C -0.720094 -5.946486 -0.226810<br/> H 0.380738 -5.652416 1.727679<br/> H -2.174789 -4.832753 -1.536873<br/> H -0.696142 -6.992762 -0.507216</p>                                                                                             | <p>-620, 57, 63, 106, 150, 220, 294, 324, 393, 431, 457, 529,<br/> 580, 595, 680, 712, 728, 759, 798, 828, 839, 916, 925,<br/> 926, 957, 970, 1019, 1024, 1026, 1069, 1071, 1131,<br/> 1174, 1193, 1202, 1257, 1276, 1330, 1348, 1355, 1417,<br/> 1444, 1481, 1493, 1505, 1539, 1542, 1659, 1682, 3055,<br/> 3117, 3143, 3169, 3176, 3180, 3184, 3197, 3205, 3209,<br/> 3219,</p> |
| <p><b>i16-i18</b></p> <p>C -2.601349 -2.254885 -0.001470<br/> C -1.243361 -2.378469 -0.293587<br/> C -0.461687 -1.221991 -0.358655<br/> C -1.006147 0.038764 -0.166826<br/> C -2.370840 0.135185 0.103947<br/> C -3.160899 -1.000919 0.186707<br/> H -3.207085 -3.146443 0.096888<br/> H 0.597077 -1.318198 -0.572734<br/> H -2.812712 1.111797 0.261715<br/> H -4.214616 -0.908183 0.413269<br/> C -0.160385 1.278303 -0.264705<br/> H -0.347068 1.945533 0.576673<br/> H 0.899992 1.033147 -0.278502<br/> H -0.389437 1.831661 -1.176857<br/> C -0.638202 -3.691525 -0.526517<br/> C -0.130662 -5.357142 0.723158<br/> C -1.353490 -4.822917 -0.966779<br/> H 0.431361 -3.687361 -0.689002<br/> C -0.734372 -5.931524 -0.337950<br/> H 0.545543 -5.671062 1.509445</p> | <p>-619, 50, 59, 103, 150, 221, 294, 323, 394, 430, 456, 529,<br/> 575, 595, 673, 703, 724, 752, 789, 826, 833, 906, 920,<br/> 924, 951, 970, 1016, 1020, 1024, 1068, 1073, 1129,<br/> 1171, 1192, 1201, 1259, 1276, 1331, 1348, 1355, 1416,<br/> 1443, 1480, 1493, 1503, 1540, 1541, 1661, 1682, 3055,<br/> 3114, 3143, 3165, 3167, 3176, 3178, 3182, 3189, 3200,<br/> 3203,</p> |

|                                                                                                                                                                                                                                                                                                                                                                                                                                                                                                                                                                                                                                                                                                                                                                                                                                                     |                                                                                                                                                                                                                                                                                                                                                                                    |
|-----------------------------------------------------------------------------------------------------------------------------------------------------------------------------------------------------------------------------------------------------------------------------------------------------------------------------------------------------------------------------------------------------------------------------------------------------------------------------------------------------------------------------------------------------------------------------------------------------------------------------------------------------------------------------------------------------------------------------------------------------------------------------------------------------------------------------------------------------|------------------------------------------------------------------------------------------------------------------------------------------------------------------------------------------------------------------------------------------------------------------------------------------------------------------------------------------------------------------------------------|
| <p>H -2.302526 -4.793235 -1.486908<br/> H -0.740027 -6.973010 -0.636567</p>                                                                                                                                                                                                                                                                                                                                                                                                                                                                                                                                                                                                                                                                                                                                                                         |                                                                                                                                                                                                                                                                                                                                                                                    |
| <p><b>i17-i19</b></p> <p>C -5.699638 -2.945451 0.638551<br/> C -4.348898 -2.910535 0.342886<br/> C -3.798402 -1.802203 -0.297486<br/> C -4.639896 -0.735785 -0.673058<br/> C -6.023605 -0.784610 -0.398170<br/> C -6.525839 -1.877392 0.279412<br/> H -1.790243 -2.542554 -0.767015<br/> H -6.120305 -3.801381 1.148315<br/> H -3.704236 -3.731899 0.629397<br/> C -2.358984 -1.664709 -0.481591<br/> C -3.618037 0.912557 0.448046<br/> H -7.583363 -1.918388 0.509684<br/> C -2.326591 0.647005 0.423708<br/> C -1.707756 -0.524035 -0.202785<br/> H -1.644739 1.302002 0.966116<br/> H -0.631345 -0.498971 -0.314638<br/> C -6.897856 0.351276 -0.839586<br/> H -6.800604 0.524661 -1.912557<br/> H -7.945462 0.157231 -0.617300<br/> H -6.607386 1.277215 -0.338009<br/> H -4.188853 1.699876 0.917743<br/> H -4.290586 -0.054178 -1.440012</p> | <p>-444, 61, 100, 143, 167, 229, 288, 358, 394, 447, 476,<br/> 522, 538, 559, 660, 715, 727, 767, 775, 821, 853, 913,<br/> 915, 939, 974, 997, 1004, 1017, 1026, 1035, 1066, 1119,<br/> 1183, 1186, 1214, 1254, 1277, 1326, 1342, 1413, 1433,<br/> 1438, 1487, 1496, 1536, 1603, 1644, 1652, 1684, 3044,<br/> 3088, 3100, 3144, 3158, 3175, 3177, 3185, 3195, 3202,<br/> 3219,</p> |
| <p><b>i17-i27</b></p> <p>C 0.002728 0.169670 -0.046382<br/> C -0.114823 -0.058615 1.329626<br/> C 1.063053 -0.195756 2.076166<br/> C 2.316252 -0.140719 1.480998<br/> C 2.398069 0.061271 0.105607<br/> C 1.245737 0.223174 -0.650201<br/> H -0.895521 0.291614 -0.638501<br/> H 1.006204 -0.299671 3.150449<br/> H 3.369817 0.104731 -0.370992<br/> H 1.319342 0.391597 -1.716331<br/> C 3.568774 -0.274654 2.303213<br/> H 4.145066 0.651388 2.286246</p>                                                                                                                                                                                                                                                                                                                                                                                         | <p>-1865, 43, 68, 105, 158, 188, 219, 259, 300, 348, 380,<br/> 436, 469, 510, 535, 567, 608, 713, 731, 751, 752, 826,<br/> 872, 908, 918, 939, 957, 984, 1013, 1020, 1033, 1068,<br/> 1132, 1184, 1194, 1235, 1278, 1327, 1352, 1413, 1425,<br/> 1471, 1492, 1506, 1530, 1585, 1657, 1679, 1915, 2361,</p>                                                                         |

|                                                                                                                                                                                                                                                                                                                                                                                                                                                                                                                                                                                                                                                                                                                                                                                                                                                        |                                                                                                                                                                                                                                                                                                                                                     |
|--------------------------------------------------------------------------------------------------------------------------------------------------------------------------------------------------------------------------------------------------------------------------------------------------------------------------------------------------------------------------------------------------------------------------------------------------------------------------------------------------------------------------------------------------------------------------------------------------------------------------------------------------------------------------------------------------------------------------------------------------------------------------------------------------------------------------------------------------------|-----------------------------------------------------------------------------------------------------------------------------------------------------------------------------------------------------------------------------------------------------------------------------------------------------------------------------------------------------|
| <p>H 3.337855 -0.509043 3.340861<br/> H 4.210166 -1.064037 1.910313<br/> C -1.443685 -0.147573 1.910216<br/> H -2.248288 0.223755 1.288031<br/> C -1.809037 -0.680750 3.104007<br/> H -2.865637 -0.688264 3.348196<br/> C -1.018866 -1.361169 4.048169<br/> H -0.145530 -2.214842 3.876770<br/> C -0.477746 -1.816602 5.126446<br/> H -0.128931 -1.418774 6.079804</p>                                                                                                                                                                                                                                                                                                                                                                                                                                                                                 | <p>3054, 3088, 3112, 3145, 3166, 3168, 3173, 3183, 3198, 3212,</p>                                                                                                                                                                                                                                                                                  |
| <p><b>i18-i19</b></p> <p>C -5.340947 -3.198074 0.988914<br/> C -4.028917 -3.113823 0.559174<br/> C -3.619966 -2.051515 -0.244350<br/> C -4.566060 -1.086548 -0.643968<br/> C -5.912119 -1.189843 -0.231568<br/> C -6.270665 -2.229155 0.603475<br/> H -1.615436 -2.712852 -0.832877<br/> H -5.650144 -4.016068 1.625071<br/> H -3.303211 -3.856609 0.865981<br/> C -2.216950 -1.846292 -0.582296<br/> C -3.568835 0.732332 0.201617<br/> H -7.296848 -2.308989 0.940507<br/> C -2.269225 0.547756 0.075393<br/> C -1.627173 -0.643871 -0.486669<br/> H -1.589088 1.298770 0.477158<br/> H -0.570129 -0.563717 -0.705904<br/> C -6.903412 -0.170151 -0.707849<br/> H -7.896533 -0.362244 -0.306115<br/> H -6.598989 0.833931 -0.404827<br/> H -6.968966 -0.169276 -1.797342<br/> H -4.150346 1.528055 0.643282<br/> H -4.336287 -0.472291 -1.506982</p> | <p>-445, 60, 99, 144, 166, 227, 293, 358, 394, 449, 475, 521, 537, 559, 662, 715, 726, 766, 774, 823, 855, 915, 922, 936, 973, 997, 1003, 1017, 1027, 1034, 1063, 1117, 1182, 1184, 1212, 1254, 1278, 1323, 1340, 1411, 1430, 1435, 1484, 1497, 1535, 1604, 1642, 1651, 1684, 3044, 3100, 3102, 3138, 3166, 3172, 3174, 3178, 3194, 3205, 3218,</p> |
| <p><b>i18-i20</b></p> <p>C -5.707767 -2.859645 0.658115<br/> C -4.431632 -2.991920 0.353147<br/> C -3.887953 -1.310474 -1.002089<br/> C -4.711453 -0.315239 -0.434092</p>                                                                                                                                                                                                                                                                                                                                                                                                                                                                                                                                                                                                                                                                              |                                                                                                                                                                                                                                                                                                                                                     |



|                                                                                                                                                                                                                                                                                                                                                                                                                                                                                                                                                                                                                                                                                                                                                     |                                                                                                                                                                                                                                                                                                                                                                                                                                                                                                                                                                                 |
|-----------------------------------------------------------------------------------------------------------------------------------------------------------------------------------------------------------------------------------------------------------------------------------------------------------------------------------------------------------------------------------------------------------------------------------------------------------------------------------------------------------------------------------------------------------------------------------------------------------------------------------------------------------------------------------------------------------------------------------------------------|---------------------------------------------------------------------------------------------------------------------------------------------------------------------------------------------------------------------------------------------------------------------------------------------------------------------------------------------------------------------------------------------------------------------------------------------------------------------------------------------------------------------------------------------------------------------------------|
| <p>C -6.130946 -0.587990 -0.245066<br/> C -6.577596 -1.772373 0.202348<br/> H -1.866862 -1.815310 -1.560963<br/> H -6.160995 -3.562779 1.356764<br/> H -3.677185 -3.701962 0.657896<br/> C -2.500917 -1.081658 -1.081147<br/> C -4.133376 0.860888 0.038972<br/> H -6.834837 0.224622 -0.385211<br/> H -7.639544 -1.899533 0.369613<br/> C -2.762487 1.068265 -0.001031<br/> C -1.954058 0.069214 -0.562586<br/> H -4.775252 1.620296 0.471933<br/> H -0.883480 0.227695 -0.615861<br/> C -2.144776 2.321064 0.551909<br/> H -1.396640 2.722764 -0.132036<br/> H -2.897250 3.088447 0.725290<br/> H -1.644113 2.123003 1.501651<br/> H -4.340285 -2.043145 -1.657303</p>                                                                            | <p>-458, 80, 109, 148, 205, 227, 292, 345, 404, 431, 449,<br/> 514, 539, 572, 660, 698, 735, 775, 794, 817, 865, 907,<br/> 922, 926, 966, 990, 999, 1016, 1026, 1039, 1071, 1116,<br/> 1178, 1191, 1210, 1258, 1276, 1320, 1343, 1420, 1422,<br/> 1471, 1493, 1497, 1522, 1594, 1626, 1663, 1682, 3053,<br/> 3101, 3113, 3145, 3161, 3165, 3169, 3175, 3191, 3194,<br/> 3215,</p>                                                                                                                                                                                               |
| <p><b>i18-i26</b></p> <p>C -0.118388 0.343141 0.183240<br/> C -0.019160 0.161525 1.567744<br/> C 1.256506 -0.024530 2.116575<br/> C 2.405539 0.000692 1.341754<br/> C 2.276304 0.201779 -0.031776<br/> C 1.023376 0.362646 -0.602250<br/> H -1.087642 0.415030 -0.286939<br/> H 1.343695 -0.184002 3.185882<br/> H 3.161991 0.215230 -0.654752<br/> H 0.932860 0.490748 -1.672874<br/> C 3.761988 -0.158222 1.971314<br/> H 4.161697 0.811206 2.274733<br/> H 3.714110 -0.787147 2.859120<br/> H 4.469715 -0.602058 1.272593<br/> C -1.166541 0.157931 2.459211<br/> H -0.994071 -0.260329 3.442945<br/> C -2.407204 0.659438 2.230128<br/> H -3.131655 0.597389 3.034694<br/> C -2.874933 1.384148 1.120078<br/> H -2.318455 2.271606 0.470511</p> | <p>-1842, -1842, 26, 26, 40, 40, 116, 116, 152, 152, 190,<br/> 190, 215, 215, 264, 264, 299, 299, 330, 330, 386, 386,<br/> 435, 435, 465, 465, 509, 509, 536, 536, 573, 573, 609,<br/> 609, 707, 707, 725, 725, 754, 754, 781, 781, 826, 826,<br/> 857, 857, 908, 908, 919, 919, 947, 947, 956, 956, 972,<br/> 972, 1016, 1016, 1022, 1022, 1028, 1028, 1069, 1069,<br/> 1137, 1137, 1185, 1185, 1200, 1200, 1232, 1232, 1280,<br/> 1280, 1338, 1338, 1350, 1350, 1416, 1416, 1423, 1423,<br/> 1458, 1458, 1494, 1494, 1500, 1500, 1540, 1540, 1582,<br/> 1582, 1654, 1654,</p> |

|                                                                                                                                                                                                                                                                                                                                                                                                                                                                                                                                                                                                                                                                                                                                                                                          |                                                                                                                                                                                                                                                                                                                                                                   |
|------------------------------------------------------------------------------------------------------------------------------------------------------------------------------------------------------------------------------------------------------------------------------------------------------------------------------------------------------------------------------------------------------------------------------------------------------------------------------------------------------------------------------------------------------------------------------------------------------------------------------------------------------------------------------------------------------------------------------------------------------------------------------------------|-------------------------------------------------------------------------------------------------------------------------------------------------------------------------------------------------------------------------------------------------------------------------------------------------------------------------------------------------------------------|
| C -3.574038 1.874800 0.153335<br>H -4.227604 1.493731 -0.632104                                                                                                                                                                                                                                                                                                                                                                                                                                                                                                                                                                                                                                                                                                                          |                                                                                                                                                                                                                                                                                                                                                                   |
| <b>i19-p1</b><br><br>C -5.744514 -3.023357 0.569171<br>C -4.381149 -2.982831 0.535759<br>C -3.704792 -1.760301 0.338697<br>C -4.471485 -0.576393 0.048706<br>C -5.911548 -0.628257 0.208612<br>C -6.502171 -1.832948 0.437871<br>H -1.729376 -2.587481 0.494194<br>H -6.257077 -3.961984 0.729359<br>H -3.797895 -3.884057 0.676700<br>C -2.297036 -1.676451 0.350254<br>C -3.768037 0.679304 0.036387<br>H -7.580556 -1.884214 0.521486<br>C -2.410486 0.717276 0.087518<br>C -1.658187 -0.476702 0.207884<br>H -1.895949 1.667691 0.044023<br>H -0.578249 -0.429262 0.226325<br>C -6.716905 0.619651 0.022094<br>H -6.462047 1.378345 0.764254<br>H -6.528024 1.052939 -0.964339<br>H -7.780434 0.406895 0.103751<br>H -4.332095 1.594971 -0.067720<br>H -4.533430 -0.761263 -1.571346 | -1162, 110, 163, 216, 246, 285, 396, 414, 459, 463, 507,<br>528, 557, 574, 601, 647, 712, 747, 791, 814, 822, 875,<br>894, 935, 986, 995, 1006, 1017, 1041, 1064, 1084, 1097,<br>1158, 1191, 1196, 1230, 1268, 1290, 1382, 1399, 1413,<br>1430, 1470, 1482, 1496, 1508, 1549, 1632, 1679, 1694,<br>3037, 3093, 3138, 3171, 3173, 3184, 3185, 3203, 3206,<br>3211, |
| <b>i19-i26</b><br><br>C -0.219725 0.428912 0.075499<br>C 0.044141 0.137095 1.421030<br>C 1.472452 0.034629 1.964699<br>C 2.333817 0.997282 1.192398<br>C 2.101555 1.070058 -0.201837<br>C 0.957923 0.555919 -0.756921<br>H -0.445831 -0.758122 0.697406<br>C 1.597300 0.127989 3.457885<br>C 3.343829 1.702085 1.842014<br>H 2.840143 1.575595 -0.815615<br>C 3.475374 1.653658 3.211314<br>C 2.568134 0.886103 4.007829                                                                                                                                                                                                                                                                                                                                                                 | -1062, 75, 142, 181, 241, 263, 326, 411, 426, 454, 487,<br>527, 542, 569, 652, 708, 760, 785, 786, 833, 894, 914,<br>932, 968, 986, 991, 1029, 1051, 1064, 1091, 1110, 1164,<br>1189, 1204, 1246, 1252, 1283, 1334, 1361, 1370, 1390,<br>1415, 1433, 1465, 1482, 1491, 1511, 1551, 1671, 2227,<br>2884, 3039, 3091, 3138, 3147, 3151, 3180, 3187, 3191,<br>3215,  |

|                                                                                                                                                                                                                                                                                                                                                                                                                                                                                                                                                                                                                                                                                                                                                                                                                     |                                                                                                                                                                                                                                                                                                                                                                                      |
|---------------------------------------------------------------------------------------------------------------------------------------------------------------------------------------------------------------------------------------------------------------------------------------------------------------------------------------------------------------------------------------------------------------------------------------------------------------------------------------------------------------------------------------------------------------------------------------------------------------------------------------------------------------------------------------------------------------------------------------------------------------------------------------------------------------------|--------------------------------------------------------------------------------------------------------------------------------------------------------------------------------------------------------------------------------------------------------------------------------------------------------------------------------------------------------------------------------------|
| <p>H 4.007599 2.321745 1.251317<br/> H 2.671071 0.914648 5.085623<br/> H 1.821748 -0.980034 1.688239<br/> H 0.847337 0.513984 -1.832593<br/> H 4.251194 2.224810 3.701251<br/> C 0.675714 -0.715777 4.279439<br/> H -0.356530 -0.364710 4.220250<br/> H 0.676755 -1.748986 3.921218<br/> H 0.971389 -0.712406 5.326535<br/> H -0.768381 0.216452 2.138576</p>                                                                                                                                                                                                                                                                                                                                                                                                                                                       |                                                                                                                                                                                                                                                                                                                                                                                      |
| <p><b>i19-i23</b></p> <p>C 0.007988 -0.022426 -0.025365<br/> C 0.022059 0.048416 1.357249<br/> C 1.217043 0.128880 2.060528<br/> C 2.469724 0.078473 1.343348<br/> C 2.438363 0.086228 -0.098044<br/> C 1.220936 0.012800 -0.727571<br/> H 0.337768 0.211736 4.040308<br/> H -0.926783 -0.077067 -0.563634<br/> H -0.906271 0.057874 1.914986<br/> C 1.271915 0.239396 3.493879<br/> C 3.700679 0.286200 2.103672<br/> H 1.203727 -0.002508 -1.810919<br/> C 3.685613 0.500854 3.463115<br/> C 2.442799 0.434442 4.153446<br/> H 4.612253 0.623667 4.001669<br/> H 2.434464 0.545865 5.229754<br/> C 3.728765 0.087892 -0.853550<br/> H 4.320340 0.983505 -0.648571<br/> H 4.346047 -0.773663 -0.572338<br/> H 3.549576 0.037595 -1.925212<br/> H 4.626473 0.309787 1.546233<br/> H 3.147983 -1.066023 1.721561</p> | <p>-1631, 115, 187, 228, 261, 278, 350, 410, 435, 469, 478,<br/> 519, 553, 588, 635, 715, 748, 777, 798, 807, 845, 863,<br/> 922, 943, 969, 995, 1011, 1030, 1034, 1068, 1081, 1105,<br/> 1170, 1184, 1188, 1251, 1259, 1283, 1354, 1406, 1420,<br/> 1433, 1472, 1485, 1494, 1501, 1533, 1588, 1648, 1684,<br/> 3021, 3076, 3137, 3170, 3179, 3182, 3198, 3212, 3213,<br/> 3227,</p> |
| <p><b>i20-p2</b></p> <p>C -5.894631 -2.963681 0.408211<br/> C -4.536734 -2.981244 0.363719<br/> C -3.799714 -1.762760 0.172946<br/> C -4.512665 -0.517167 0.272842<br/> C -5.921560 -0.548442 0.288752</p>                                                                                                                                                                                                                                                                                                                                                                                                                                                                                                                                                                                                          |                                                                                                                                                                                                                                                                                                                                                                                      |

|                                                                                                                                                                                                                                                                                                                                                                                                                                                                                                                                                                                                                                                                                                                                                                                                                          |                                                                                                                                                                                                                                                                                                                                                                                      |
|--------------------------------------------------------------------------------------------------------------------------------------------------------------------------------------------------------------------------------------------------------------------------------------------------------------------------------------------------------------------------------------------------------------------------------------------------------------------------------------------------------------------------------------------------------------------------------------------------------------------------------------------------------------------------------------------------------------------------------------------------------------------------------------------------------------------------|--------------------------------------------------------------------------------------------------------------------------------------------------------------------------------------------------------------------------------------------------------------------------------------------------------------------------------------------------------------------------------------|
| <p>C -6.599061 -1.736523 0.329395<br/> H -1.838373 -2.668178 0.412491<br/> H -6.445822 -3.887907 0.515972<br/> H -3.986440 -3.911567 0.420563<br/> C -2.371585 -1.728111 0.351526<br/> C -3.775077 0.687113 0.271373<br/> H -6.461778 0.390123 0.282983<br/> H -7.680155 -1.742381 0.345656<br/> C -2.407246 0.696685 0.301884<br/> C -1.711879 -0.545394 0.386391<br/> H -4.320161 1.624225 0.261381<br/> H -0.633669 -0.529615 0.490564<br/> C -1.619935 1.974083 0.297328<br/> H -0.978859 2.036530 1.178483<br/> H -0.969887 2.023844 -0.577933<br/> H -2.273609 2.843902 0.286146<br/> H -3.775494 -1.789555 -1.452084</p>                                                                                                                                                                                          | <p>-1199, 103, 148, 165, 259, 281, 380, 396, 442, 479, 486,<br/> 516, 567, 601, 629, 649, 710, 758, 763, 811, 843, 889,<br/> 897, 933, 964, 990, 1007, 1016, 1028, 1043, 1067, 1149,<br/> 1162, 1185, 1199, 1223, 1276, 1287, 1386, 1401, 1412,<br/> 1422, 1471, 1490, 1498, 1511, 1543, 1624, 1680, 1703,<br/> 3053, 3109, 3146, 3169, 3174, 3176, 3182, 3193, 3195,<br/> 3206,</p> |
| <p><b>i20-i24</b></p> <p>C 0.020062 -0.114653 -0.010072<br/> C 0.012846 -0.118473 1.375549<br/> C 1.188319 -0.049555 2.110470<br/> C 2.451152 -0.035453 1.406217<br/> C 2.421107 0.072454 -0.025281<br/> C 1.236470 0.007947 -0.712197<br/> H 0.293949 -0.079853 4.085491<br/> H -0.908782 -0.163672 -0.562080<br/> H -0.927152 -0.161220 1.912520<br/> C 1.230912 -0.012253 3.547226<br/> C 3.671642 0.138810 2.184251<br/> C 3.645684 0.279308 3.555316<br/> C 2.395469 0.163939 4.225782<br/> H 4.566384 0.374690 4.108986<br/> H 2.375482 0.218409 5.306327<br/> H 4.596267 0.197375 1.623691<br/> H 3.114060 -1.167415 1.753965<br/> C 1.211193 0.096333 -2.212254<br/> H 2.211258 0.219930 -2.623171<br/> H 0.774134 -0.807271 -2.639692<br/> H 0.598552 0.938058 -2.537421<br/> H 3.357966 0.183007 -0.557600</p> | <p>-1692, 97, 132, 151, 261, 287, 360, 407, 439, 457, 496,<br/> 527, 619, 623, 689, 712, 733, 781, 791, 798, 852, 884,<br/> 921, 956, 964, 992, 1008, 1028, 1043, 1051, 1063, 1141,<br/> 1166, 1185, 1204, 1237, 1266, 1295, 1362, 1385, 1415,<br/> 1440, 1453, 1484, 1490, 1500, 1547, 1573, 1647, 1687,<br/> 3057, 3116, 3147, 3173, 3175, 3177, 3189, 3196, 3198,<br/> 3224,</p>  |

|                                                                                                                                                                                                                                                                                                                                                                                                                                                                                                                                                                                                                                                                                                                                                                                                                 |                                                                                                                                                                                                                                                                                                                                                         |
|-----------------------------------------------------------------------------------------------------------------------------------------------------------------------------------------------------------------------------------------------------------------------------------------------------------------------------------------------------------------------------------------------------------------------------------------------------------------------------------------------------------------------------------------------------------------------------------------------------------------------------------------------------------------------------------------------------------------------------------------------------------------------------------------------------------------|---------------------------------------------------------------------------------------------------------------------------------------------------------------------------------------------------------------------------------------------------------------------------------------------------------------------------------------------------------|
| <p><b>i20-i25</b></p> <p>C -0.031212 0.020412 0.113424<br/> C 0.074665 -0.391089 1.383255<br/> C 1.309677 -0.029097 2.182348<br/> C 2.458424 0.431155 1.310941<br/> C 2.374331 0.518468 -0.032738<br/> C 1.061956 0.475323 -0.661655<br/> H 0.186410 0.920829 3.860869<br/> H -0.623515 -1.087264 1.830350<br/> C 1.162928 0.843322 3.399628<br/> C 3.651708 0.822635 2.041441<br/> H 3.251362 0.769507 -0.617273<br/> H 0.877576 1.073351 -1.546265<br/> C 3.557461 1.297137 3.298464<br/> C 2.240310 1.424537 3.928146<br/> H 4.600319 0.846978 1.517043<br/> H 2.168437 2.009007 4.837584<br/> C 4.743816 1.799952 4.061540<br/> H 4.619424 2.856521 4.308494<br/> H 4.847236 1.263293 5.006833<br/> H 5.664875 1.681992 3.494471<br/> H 1.661670 -0.993957 2.600044<br/> H 0.363442 -0.601349 -1.000979</p> | <p>-1841, 93, 111, 162, 231, 293, 331, 389, 414, 434, 474, 541, 550, 604, 658, 691, 712, 746, 790, 832, 845, 891, 922, 930, 1007, 1009, 1024, 1056, 1067, 1094, 1123, 1184, 1190, 1205, 1216, 1260, 1277, 1305, 1352, 1390, 1412, 1417, 1439, 1478, 1493, 1560, 1640, 1651, 1723, 2027, 2890, 3040, 3096, 3135, 3161, 3166, 3173, 3182, 3193, 3198,</p> |
| <p><b>i21-i23</b></p> <p>C 0.005561 -0.009364 -0.004653<br/> C 0.000733 -0.008269 1.343031<br/> C 2.347303 0.004470 1.666792<br/> C 2.822416 0.806888 0.643501<br/> C 1.999057 1.359066 -0.434512<br/> C 0.759164 0.963683 -0.770798<br/> H -0.489424 -0.807806 -0.546831<br/> H 0.253266 0.887110 1.893744<br/> C 3.109390 -0.573136 2.648088<br/> C 4.207565 1.022583 0.641745<br/> H 2.506716 2.063390 -1.083792<br/> H 0.341145 1.321297 -1.705159<br/> C 5.020279 0.456683 1.610553<br/> C 4.489579 -0.343859 2.616806<br/> H 4.642624 1.640351 -0.135408</p>                                                                                                                                                                                                                                              | <p>-1038, 81, 115, 139, 230, 261, 333, 367, 417, 441, 481, 490, 573, 606, 670, 697, 751, 759, 799, 861, 899, 923, 937, 981, 986, 1001, 1012, 1054, 1063, 1080, 1146, 1174, 1180, 1212, 1242, 1252, 1278, 1357, 1369, 1387, 1412, 1416, 1459, 1469, 1477, 1482, 1507, 1563, 1676, 2199, 2871, 3043, 3098, 3121, 3138, 3149, 3165, 3176, 3182, 3186,</p>  |

|                                                                                                                                                                                                                                                                                                                                                                                                                                                                                                                                                                                                                                                                                                                                                                                                                            |                                                                                                                                                                                                                                                                                                                                                                                    |
|----------------------------------------------------------------------------------------------------------------------------------------------------------------------------------------------------------------------------------------------------------------------------------------------------------------------------------------------------------------------------------------------------------------------------------------------------------------------------------------------------------------------------------------------------------------------------------------------------------------------------------------------------------------------------------------------------------------------------------------------------------------------------------------------------------------------------|------------------------------------------------------------------------------------------------------------------------------------------------------------------------------------------------------------------------------------------------------------------------------------------------------------------------------------------------------------------------------------|
| <p>H -0.472417 -0.804580 1.902126<br/> H 6.086585 0.640337 1.585810<br/> C 2.494455 -1.445303 3.737624<br/> H 2.723698 -2.481684 3.551267<br/> H 2.891446 -1.168850 4.700079<br/> H 1.424851 -1.322440 3.748298<br/> H 5.123041 -0.765477 3.376426</p>                                                                                                                                                                                                                                                                                                                                                                                                                                                                                                                                                                     |                                                                                                                                                                                                                                                                                                                                                                                    |
| <p><b>i22-i24</b></p> <p>C -0.205300 -0.272582 -0.029080<br/> C -0.214144 0.487562 1.083493<br/> C 2.040063 0.141777 1.720814<br/> C 2.723611 0.099831 0.517389<br/> C 2.092156 0.117642 -0.803608<br/> C 0.792685 -0.102812 -1.067106<br/> H 2.018528 0.105505 3.864134<br/> H -0.901191 -1.098953 -0.125529<br/> H 0.276925 1.450624 1.095769<br/> C 2.614835 0.061463 2.959716<br/> C 4.114083 -0.040893 0.625737<br/> H 2.778900 0.196216 -1.638853<br/> H 0.494470 -0.248981 -2.099224<br/> C 4.734759 -0.129622 1.861217<br/> C 4.004615 -0.082417 3.046501<br/> H 4.708924 -0.085590 -0.279528<br/> H -0.891162 0.278327 1.900940<br/> H 5.810923 -0.239613 1.908887<br/> C 4.684237 -0.148041 4.385593<br/> H 4.105000 -0.743657 5.090510<br/> H 5.677789 -0.585184 4.300859<br/> H 4.794531 0.850503 4.812759</p> | <p>-408, 82, 110, 130, 196, 222, 304, 342, 399, 425, 426,<br/> 489, 565, 593, 644, 706, 731, 789, 804, 841, 857, 893,<br/> 925, 969, 988, 991, 1012, 1015, 1028, 1066, 1088, 1165,<br/> 1197, 1225, 1236, 1291, 1296, 1316, 1411, 1413, 1435,<br/> 1468, 1493, 1499, 1523, 1591, 1615, 1658, 1687, 3057,<br/> 3118, 3143, 3143, 3149, 3158, 3172, 3172, 3174, 3192,<br/> 3233,</p> |
| <p><b>i23-p1</b></p> <p>C -5.747783 -3.199578 -0.235509<br/> C -4.383110 -3.198498 -0.211254<br/> C -3.671149 -1.977556 -0.261810<br/> C -4.388174 -0.759316 -0.341305<br/> C -5.808859 -0.775977 -0.353196<br/> C -6.456899 -1.984120 -0.303807<br/> H -1.720710 -2.889240 -0.173058<br/> H -6.293529 -4.132609 -0.197156</p>                                                                                                                                                                                                                                                                                                                                                                                                                                                                                             | <p>-870, 142, 173, 216, 259, 291, 298, 409, 443, 464, 484,<br/> 490, 521, 572, 578, 647, 721, 770, 800, 805, 838, 880,<br/> 909, 940, 1002, 1007, 1019, 1038, 1058, 1072, 1091,<br/> 1108, 1168, 1183, 1196, 1236, 1271, 1294, 1384, 1407,<br/> 1419, 1434, 1470, 1491, 1503, 1511, 1561, 1648, 1659,</p>                                                                          |

|                                                                                                                                                                                                                                                                                                                                                                                                                                                                                                                                                                                                                                                                                                                                                                                               |                                                                                                                                                                                                                                                                                                                                                                   |
|-----------------------------------------------------------------------------------------------------------------------------------------------------------------------------------------------------------------------------------------------------------------------------------------------------------------------------------------------------------------------------------------------------------------------------------------------------------------------------------------------------------------------------------------------------------------------------------------------------------------------------------------------------------------------------------------------------------------------------------------------------------------------------------------------|-------------------------------------------------------------------------------------------------------------------------------------------------------------------------------------------------------------------------------------------------------------------------------------------------------------------------------------------------------------------|
| H -3.827390 -4.125713 -0.152322<br>C -2.254241 -1.949480 -0.240748<br>C -3.649212 0.464097 -0.370545<br>H -7.539448 -2.003389 -0.311817<br>C -2.267510 0.446478 -0.418264<br>C -1.569800 -0.766687 -0.324505<br>H -3.976651 0.945507 1.399588<br>H -1.723533 1.377321 -0.500129<br>H -0.488408 -0.764522 -0.329572<br>C -6.577501 0.512743 -0.395266<br>H -6.309943 1.150445 0.450802<br>H -6.364758 1.074744 -1.306570<br>H -7.647997 0.323895 -0.356608<br>H -4.172164 1.389204 -0.568117                                                                                                                                                                                                                                                                                                   | 1693, 3046, 3102, 3139, 3176, 3178, 3184, 3190, 3200,<br>3203, 3209,                                                                                                                                                                                                                                                                                              |
| <b>i24-p2</b><br><br>C -5.998004 -2.814916 0.377659<br>C -4.631547 -2.809511 0.588730<br>C -3.902717 -1.584019 0.521031<br>C -4.572427 -0.407341 0.115487<br>C -5.958503 -0.470447 -0.173223<br>C -6.653087 -1.642981 -0.031960<br>H -2.009003 -2.418215 1.118799<br>H -6.555998 -3.733774 0.492131<br>H -4.143324 -3.677118 1.014129<br>C -2.524942 -1.514498 0.818163<br>C -3.841514 0.801084 0.022482<br>H -6.465526 0.433112 -0.487716<br>H -7.716017 -1.668004 -0.230171<br>C -2.505803 0.856970 0.315973<br>C -1.849774 -0.331729 0.720684<br>H -4.364849 1.698118 -0.288757<br>H -0.792198 -0.292067 0.952278<br>C -1.722039 2.134280 0.215441<br>H -2.357585 2.967705 -0.077033<br>H -1.254603 2.378641 1.170411<br>H -0.922798 2.039368 -0.521312<br>H -4.054895 -3.521689 -1.024722 | -894, 110, 141, 171, 262, 268, 286, 388, 419, 426, 456,<br>511, 525, 547, 631, 651, 716, 769, 793, 811, 848, 893,<br>903, 932, 973, 1001, 1009, 1027, 1035, 1056, 1070,<br>1150, 1161, 1184, 1202, 1235, 1278, 1292, 1392, 1396,<br>1413, 1421, 1472, 1490, 1503, 1516, 1559, 1636, 1661,<br>1708, 3051, 3110, 3143, 3171, 3173, 3174, 3179, 3190,<br>3193, 3207, |
| <b>1-methylnaphthalene (p1)</b><br><br>C -5.001462 -1.547949 0.186087                                                                                                                                                                                                                                                                                                                                                                                                                                                                                                                                                                                                                                                                                                                         | 134, 173, 208, 252, 292, 423, 443, 481, 486, 521, 551,<br>579, 649, 722, 754, 805, 805, 824, 880, 891, 936, 992,<br>1000, 1013, 1023, 1054, 1071, 1089, 1107, 1171, 1192,                                                                                                                                                                                         |

|                                                                                                                                                                                                                                                                                                                                                                                                                                                                                                                                                                                                                                                                                                                                                  |                                                                                                                                                                                                                                                                                                                                                               |
|--------------------------------------------------------------------------------------------------------------------------------------------------------------------------------------------------------------------------------------------------------------------------------------------------------------------------------------------------------------------------------------------------------------------------------------------------------------------------------------------------------------------------------------------------------------------------------------------------------------------------------------------------------------------------------------------------------------------------------------------------|---------------------------------------------------------------------------------------------------------------------------------------------------------------------------------------------------------------------------------------------------------------------------------------------------------------------------------------------------------------|
| <p>C -3.644559 -1.515947 0.032190<br/> C -2.943592 -0.287554 0.005803<br/> C -3.666748 0.926051 0.141678<br/> C -5.072699 0.858068 0.300213<br/> C -5.723036 -0.344585 0.321660<br/> H -3.081316 -2.435048 -0.072211<br/> C -1.537080 -0.246277 -0.153916<br/> C -2.963985 2.167922 0.115304<br/> H -6.797318 -0.375723 0.443505<br/> C -1.604013 2.155699 -0.041581<br/> C -0.883489 0.949426 -0.176830<br/> H 0.190708 0.982693 -0.298897<br/> H -5.638202 1.773598 0.405346<br/> H -0.996575 -1.178727 -0.256721<br/> H -5.526140 -2.493441 0.204527<br/> H -1.066216 3.095343 -0.062212<br/> C -3.708171 3.464656 0.259466<br/> H -4.450007 3.586866 -0.531557<br/> H -4.239512 3.512315 1.211651<br/> H -3.021302 4.306945 0.212899</p>     | <p>1196, 1238, 1275, 1299, 1387, 1414, 1423, 1440, 1476,<br/> 1491, 1510, 1514, 1569, 1660, 1681, 1706, 3050, 3108,<br/> 3139, 3172, 3175, 3182, 3188, 3198, 3204, 3209,</p>                                                                                                                                                                                  |
| <p><b>2-methylnaphthalene (p2)</b></p> <p>C -5.005912 -1.538075 0.184481<br/> C -3.644791 -1.519325 0.064410<br/> C -2.939391 -0.294160 0.029582<br/> C -3.661948 0.920736 0.120947<br/> C -5.070691 0.870112 0.245305<br/> C -5.726871 -0.328131 0.276019<br/> H -3.085641 -2.444216 -0.005596<br/> C -1.529297 -0.235738 -0.094903<br/> C -2.953899 2.147168 0.085349<br/> H -6.803969 -0.354259 0.371424<br/> C -1.592530 2.187195 -0.035328<br/> C -0.880866 0.962861 -0.125896<br/> H -3.517318 3.070874 0.155524<br/> H 0.197892 0.992756 -0.221980<br/> H -5.620165 1.800723 0.315509<br/> H -0.974325 -1.163171 -0.165124<br/> H -5.536944 -2.479848 0.210027<br/> C -0.835478 3.483719 -0.076229<br/> H -1.506351 4.336389 0.007981</p> | <p>66, 119, 182, 263, 283, 407, 412, 454, 489, 519, 529, 635,<br/> 653, 717, 766, 795, 800, 846, 886, 902, 929, 973, 993,<br/> 1009, 1024, 1027, 1054, 1069, 1157, 1167, 1186, 1206,<br/> 1239, 1282, 1297, 1394, 1411, 1415, 1430, 1477, 1487,<br/> 1503, 1521, 1565, 1652, 1686, 1716, 3047, 3106, 3137,<br/> 3168, 3172, 3175, 3179, 3190, 3194, 3207,</p> |



|                                                                                                                                                                                                                                                                                                                                                                                                                                                                                                                                                                                                                                                                                                                                                                                   |                                                                                                                                                                                                                                                                                                                            |
|-----------------------------------------------------------------------------------------------------------------------------------------------------------------------------------------------------------------------------------------------------------------------------------------------------------------------------------------------------------------------------------------------------------------------------------------------------------------------------------------------------------------------------------------------------------------------------------------------------------------------------------------------------------------------------------------------------------------------------------------------------------------------------------|----------------------------------------------------------------------------------------------------------------------------------------------------------------------------------------------------------------------------------------------------------------------------------------------------------------------------|
| H -0.111164 3.536201 0.738108<br>H -0.279415 3.577648 -1.010393                                                                                                                                                                                                                                                                                                                                                                                                                                                                                                                                                                                                                                                                                                                   |                                                                                                                                                                                                                                                                                                                            |
| <b>1-meta-tolyl-vinylacetylene (p3)</b><br><br>C -0.793610 -0.695936 -0.470426<br>C 0.393772 -1.029638 0.189183<br>C 1.422222 -0.114520 0.341384<br>C 1.258742 1.169449 -0.182240<br>C 0.094314 1.518048 -0.842841<br>C -0.926617 0.590102 -0.988938<br>H 0.526346 -2.028519 0.585335<br>H 2.056297 1.893799 -0.070383<br>H -0.020823 2.514641 -1.247064<br>H -1.838350 0.861360 -1.505753<br>C 2.697193 -0.484435 1.047748<br>H 3.552864 -0.385471 0.378752<br>H 2.872378 0.173162 1.899931<br>H 2.666876 -1.509955 1.410528<br>C -1.901370 -1.638272 -0.642941<br>H -2.722018 -1.288677 -1.259918<br>C -1.995568 -2.861893 -0.112415<br>H -1.212070 -3.255493 0.523506<br>C -3.111871 -3.715860 -0.332234<br>C -4.043990 -4.451987 -0.504009<br>H -4.871752 -5.099004 -0.659706 | 54, 57, 69, 106, 187, 213, 246, 339, 377, 410, 460, 518, 532, 598, 605, 707, 716, 719, 820, 860, 915, 955, 985, 989, 1018, 1022, 1026, 1033, 1070, 1110, 1131, 1195, 1217, 1305, 1322, 1328, 1345, 1417, 1450, 1468, 1491, 1507, 1539, 1657, 1679, 1700, 2359, 3055, 3118, 3139, 3165, 3178, 3179, 3180, 3197, 3210, 3262, |
| <b>2-meta-tolyl-vinylacetylene (p4)</b><br><br>C -0.177143 -0.480215 0.092822<br>C -0.233884 -0.065963 1.422728<br>C 0.946311 0.301019 2.063155<br>C 2.175994 0.238107 1.416990<br>C 2.210880 -0.196063 0.096458<br>C 1.040525 -0.546616 -0.561659<br>H -1.087452 -0.728098 -0.435512<br>H 0.903407 0.635960 3.092479<br>H 3.160050 -0.251506 -0.422111<br>H 1.077823 -0.866243 -1.594471<br>C 3.434193 0.660056 2.124312<br>H 3.615634 1.726948 1.981570<br>H 3.363490 0.478005 3.195502<br>H 4.300740 0.123880 1.740062                                                                                                                                                                                                                                                         | 43, 116, 149, 214, 240, 291, 343, 421, 428, 456, 519, 541, 626, 669, 694, 716, 722, 732, 753, 825, 879, 928, 951, 954, 964, 1018, 1019, 1026, 1070, 1126, 1148, 1201, 1243, 1313, 1348, 1355, 1416, 1443, 1469, 1491, 1506, 1546, 1663, 1685, 1700, 2249, 3051, 3114, 3136, 3166, 3176, 3187, 3196, 3211, 3260, 3473,      |

|                                                                                                                                                                                                                                                                                                                                                                                                                                                                                                                                                                                                                                                                                                                                                                                                                         |                                                                                                                                                                                                                                                                                                                                                            |
|-------------------------------------------------------------------------------------------------------------------------------------------------------------------------------------------------------------------------------------------------------------------------------------------------------------------------------------------------------------------------------------------------------------------------------------------------------------------------------------------------------------------------------------------------------------------------------------------------------------------------------------------------------------------------------------------------------------------------------------------------------------------------------------------------------------------------|------------------------------------------------------------------------------------------------------------------------------------------------------------------------------------------------------------------------------------------------------------------------------------------------------------------------------------------------------------|
| <p>C -1.526315 -0.025510 2.155313<br/> C -2.564347 -0.809203 1.853291<br/> C -1.631733 0.893535 3.253822<br/> H -3.488493 -0.743317 2.408166<br/> H -2.500003 -1.539816 1.059485<br/> C -1.714832 1.666181 4.166660<br/> H -1.796055 2.351624 4.974162</p>                                                                                                                                                                                                                                                                                                                                                                                                                                                                                                                                                              |                                                                                                                                                                                                                                                                                                                                                            |
| <p><b>4-meta-tolyl-vinylacetylene (p5)</b></p> <p>C 0.006424 0.005539 0.010193<br/> C -0.062058 0.006163 1.406824<br/> C 1.087069 -0.015309 2.182590<br/> C 2.323971 -0.036680 1.539784<br/> C 2.405873 -0.037822 0.156458<br/> C 1.253997 -0.016954 -0.613365<br/> H 3.229934 -0.051810 2.133516<br/> H 3.373381 -0.054831 -0.326779<br/> H 1.307825 -0.017165 -1.692763<br/> C 1.010637 -0.021216 3.684369<br/> H 1.432524 -0.941730 4.089783<br/> H 1.575940 0.810352 4.106096<br/> H -0.018835 0.058475 4.027828<br/> C -1.191856 0.028353 -0.766215<br/> C -2.199934 0.047572 -1.425084<br/> C -3.408035 0.070861 -2.177780<br/> H -4.327983 0.071747 -1.604307<br/> C -3.455991 0.091495 -3.507325<br/> H -4.403493 0.109005 -4.026535<br/> H -2.552552 0.091308 -4.101376<br/> H -1.034538 0.024972 1.881592</p> | <p>54, 57, 69, 106, 187, 213, 246, 339, 377, 410, 460, 518,<br/> 532, 598, 605, 707, 716, 719, 820, 860, 915, 955, 985,<br/> 989, 1018, 1022, 1026, 1033, 1070, 1110, 1131, 1195,<br/> 1217, 1305, 1322, 1328, 1345, 1417, 1450, 1468, 1491,<br/> 1507, 1539, 1657, 1679, 1700, 2359, 3055, 3118, 3139,<br/> 3165, 3178, 3179, 3180, 3197, 3210, 3262,</p> |

**Table S2.** Forward and reverse RRKM rate constants (in  $s^{-1}$ ) as functions of the collision energy E (in  $kJ\ mol^{-1}$ ) for the reaction steps from the reaction of meta-tolyl radical with vinylacetylene producing the initial adduct **i1**

| Channel                              | TS         | 0.0         | 5.0         | 10.0        | 15.0        | 20.0        | 25.0        | 30.0        | 35.0        | 40.0        | 45.0        | 50.0        | 55.0        | 60.0    |
|--------------------------------------|------------|-------------|-------------|-------------|-------------|-------------|-------------|-------------|-------------|-------------|-------------|-------------|-------------|---------|
| i1 – i5                              | 1-6        | 1.5E+0<br>1 | 3.0E+0<br>1 | 5.7E+0<br>1 | 1.0E+0<br>2 | 1.7E+0<br>2 | 2.9E+0<br>2 | 4.7E+0<br>2 | 7.4E+0<br>2 | 1.1E+0<br>3 | 1.7E+0<br>3 | 2.4E+0<br>3 | 3.5E+0<br>3 | 5.1E+03 |
| i5 - i1                              | 1-6        | 1.9E+0<br>8 | 1.4E+0<br>8 | 2.1E+0<br>8 | 2.9E+0<br>8 | 4.0E+0<br>8 | 5.3E+0<br>8 | 6.9E+0<br>8 | 8.9E+0<br>8 | 1.1E+0<br>9 | 1.4E+0<br>9 | 1.7E+0<br>9 | 2.1E+0<br>9 | 2.5E+09 |
| i1 – i6                              | 1-5        | 9.1E+0<br>0 | 1.7E+0<br>1 | 3.1E+0<br>1 | 5.5E+0<br>1 | 9.2E+0<br>1 | 1.5E+0<br>2 | 2.4E+0<br>2 | 3.7E+0<br>2 | 5.6E+0<br>2 | 8.0E+0<br>2 | 1.2E+0<br>3 | 1.7E+0<br>3 | 2.4E+03 |
| i6- i1                               | 1-5        | 2.7E+0<br>8 | 2.0E+0<br>8 | 2.7E+0<br>8 | 3.7E+0<br>8 | 4.9E+0<br>8 | 6.3E+0<br>8 | 8.0E+0<br>8 | 1.0E+0<br>9 | 1.2E+0<br>9 | 1.5E+0<br>9 | 1.8E+0<br>9 | 2.1E+0<br>9 | 2.5E+09 |
| i1 - 1-Meta-tolyl-<br>vinylacetylene | i1-p3      | 6.7E-03     | 1.3E-02     | 4.0E-02     | 1.1E-01     | 2.8E-01     | 6.6E-01     | 1.4E+0<br>0 | 3.0E+0<br>0 | 5.8E+0<br>0 | 1.0E+0<br>1 | 1.9E+0<br>1 | 3.3E+0<br>1 | 5.7E+01 |
| i6 - i8                              | 6-8        | 1.1E+1<br>2 | 1.1E+12 |
| i8 - i6                              | 6-8        | 4.3E+0<br>4 | 6.2E+0<br>4 | 8.8E+0<br>4 | 1.2E+0<br>5 | 1.7E+0<br>5 | 2.3E+0<br>5 | 3.1E+0<br>5 | 4.1E+0<br>5 | 5.3E+0<br>5 | 6.8E+0<br>5 | 8.7E+0<br>5 | 1.1E+0<br>6 | 1.4E+06 |
| i8 - i10                             | 8-10       | 9.9E+0<br>3 | 7.1E+0<br>3 | 1.0E+0<br>4 | 1.4E+0<br>4 | 1.9E+0<br>4 | 2.6E+0<br>4 | 3.5E+0<br>4 | 4.6E+0<br>4 | 6.1E+0<br>4 | 7.7E+0<br>4 | 9.9E+0<br>4 | 1.3E+0<br>5 | 1.6E+05 |
| i10 - i8                             | 8-10       | 3.6E-02     | 5.8E-02     | 9.2E-02     | 1.4E-01     | 2.2E-01     | 3.3E-01     | 5.0E-01     | 7.4E-01     | 1.1E+0<br>0 | 1.5E+0<br>0 | 2.1E+0<br>0 | 3.0E+0<br>0 | 4.2E+00 |
| i10 - 2-<br>Methylnaphthalen<br>e    | i10-<br>p2 | 1.6E+0<br>8 | 8.9E+0<br>7 | 1.0E+0<br>8 | 1.1E+0<br>8 | 1.3E+0<br>8 | 1.5E+0<br>8 | 1.6E+0<br>8 | 1.8E+0<br>8 | 2.1E+0<br>8 | 2.3E+0<br>8 | 2.6E+0<br>8 | 2.8E+0<br>8 | 3.2E+08 |
| i5 - i7                              | 5-7        | 1.5E+1<br>2 | 1.5E+12 |
| i7 - i5                              | 5-7        | 2.8E+0<br>5 | 4.1E+0<br>5 | 5.8E+0<br>5 | 8.1E+0<br>5 | 1.1E+0<br>6 | 1.5E+0<br>6 | 2.1E+0<br>6 | 2.8E+0<br>6 | 3.7E+0<br>6 | 4.7E+0<br>6 | 6.1E+0<br>6 | 7.8E+0<br>6 | 9.9E+06 |
| i7 - i9                              | 7-9        | 4.8E+0<br>4 | 3.4E+0<br>4 | 4.8E+0<br>4 | 6.6E+0<br>4 | 9.0E+0<br>4 | 1.2E+0<br>5 | 1.6E+0<br>5 | 2.1E+0<br>5 | 2.8E+0<br>5 | 3.5E+0<br>5 | 4.6E+0<br>5 | 5.8E+0<br>5 | 7.3E+05 |
| i9 - i7                              | 7-9        | 3.6E-02     | 5.8E-02     | 9.2E-02     | 1.4E-01     | 2.2E-01     | 3.3E-01     | 4.9E-01     | 7.3E-01     | 1.1E+0<br>0 | 1.5E+0<br>0 | 2.1E+0<br>0 | 3.0E+0<br>0 | 4.1E+00 |
| i9 – 1-<br>Methylnaphthalen<br>e     | i9-p1      | 1.1E+0<br>8 | 6.2E+0<br>7 | 7.1E+0<br>7 | 8.0E+0<br>7 | 9.1E+0<br>7 | 1.0E+0<br>8 | 1.2E+0<br>8 | 1.3E+0<br>8 | 1.5E+0<br>8 | 1.6E+0<br>8 | 1.8E+0<br>8 | 2.0E+0<br>8 | 2.2E+08 |

**Table S3.** Statistical product branching ratios (%) from the initial adduct **ii** as functions of the collision energy E (in kJ mol<sup>-1</sup>)

| <b>Product</b>                       | <b>0.0</b> | <b>5.0</b> | <b>10.0</b> | <b>15.0</b> | <b>20.0</b> | <b>25.0</b> | <b>30.0</b> | <b>35.0</b> | <b>40.0</b> | <b>45.0</b> | <b>50.0</b> | <b>55.0</b> | <b>60.0</b> |
|--------------------------------------|------------|------------|-------------|-------------|-------------|-------------|-------------|-------------|-------------|-------------|-------------|-------------|-------------|
| 1-meta-tolyl-vinylacetylene (p3) + H | 0.0        | 0.0        | 0.0         | 0.1         | 0.1         | 0.1         | 0.2         | 0.2         | 0.3         | 0.3         | 0.4         | 0.5         | 0.6         |
| 1-methylnaphthalaene (p1) + H        | 63.0       | 63.7       | 64.4        | 64.9        | 65.4        | 65.8        | 66.2        | 66.2        | 66.5        | 66.8        | 67.0        | 67.3        | 67.5        |
| 2-methylnaphthalaene (p2) + H        | 37.0       | 36.2       | 35.6        | 35.0        | 34.5        | 34.0        | 33.6        | 33.6        | 33.2        | 32.8        | 32.5        | 32.2        | 31.9        |
